# Supplementary material
Source: Research Square preprint supplement (doi:10.21203/rs.3.rs-10223502/v1)
Supplement: Supplementary file 1 [file 118ece534c5e72a1dea84991.docx]

**Supplementary Materials For**

**Comparative transcriptomic responses to four histone deacetylase inhibitors in feline kidney and astrocyte cell lines**

**Table S1** Concentrations of histone deacetylase (HDAC) inhibitors in the culture medium administered to each cell type, the number of viable cells before HDAC inhibitor administration (0 h), and the number of viable and dead cells 24 h after HDAC inhibitor treatment, in a 35 mm tissue culture dish containing 2 ml of the medium, obtained from three replicate experiments using CRFK cells and PG-4 cells.

Table_S1.xlsx

**Table S2** List of total RNA volume and RNA integrity numbers (RINs) of RNA solutions used for RNA sequencing extracted from two replicates of CRFK and PG-4 cells: a control sample and an HDAC inhibitor-treated sample, and Q20, Q30, GC rate, number of raw reads, number of mapped reads, mapping rate, and unique mapping rate of RNA sequencing read data from each sample.

Table_S2.xlsx

**Table S3** Gene list and Wald test results for DESeq2 implemented in iDEP v2.4.4.

Table_S3.xlsx
