# Supplementary material
Source: Research Square preprint supplement (doi:10.21203/rs.3.rs-10223502/v1)
Supplement: Supplementary file 2 [file 7a4dc61a56cda430572816cd.xlsx]

## Sheet: Up_and_down_genes_DESeq2
Table S3:
		CRFK				PG-4
gene_id	PA - Control	TS - Control	VA - Control	VO - Control	PA - Control	TS - Control	VA - Control	VO - Control
ABCA7	Up	Up	Up	Up	Up	None	None	None
ACCS	Down	Down	Down	Down	Down	Down	Down	Down
ADAT3	None	None	None	None	None	Down	Down	Down
ADORA2B	None	None	None	None	None	None	None	None
ADRA2A	None	None	None	None	None	None	None	None
AHNAK2	None	None	None	None	Up	Up	Up	Up
AJM1	None	None	None	None	Down	Down	None	Down
AK9	None	None	None	None	Up	Up	Up	None
ALDH3B1	Down	Down	None	Down	None	Up	None	None
AMBP	None	None	Up	None	Up	Up	Up	Up
ANG	None	None	None	None	None	Up	None	None
APEH	None	None	None	None	Up	None	Up	Up
APOBEC3C	None	None	Down	None	None	None	None	None
APOBR	None	None	None	Down	None	None	None	None
APOE	None	None	None	None	None	None	Down	None
ARF6	Down	Down	Down	None	Down	Down	Down	Down
ARHGAP11A	None	None	None	None	Down	Down	Down	Down
ARPC1B	Down	Down	Down	Down	None	None	Down	Down
ASCL2	None	None	None	Down	None	None	None	None
ATP5F1E	None	None	None	None	None	None	Down	None
ATP5MJ	None	None	None	None	None	None	None	None
ATP6V1FNB	None	None	None	None	Up	Up	Up	Up
AUNIP	Up	Up	Up	Up	Down	Down	Down	Down
B3GALNT1	None	None	None	None	Down	Down	Down	Down
BAIAP3	Up	Up	Up	Up	Up	Up	Up	Up
BBS10	None	None	None	None	Up	Up	None	Up
BBS12	Up	Up	Up	Up	Up	Up	Up	Up
BGN	Down	Down	Down	Down	Down	Down	Down	Down
BHLHA15	None	None	None	None	None	Down	None	Down
BLOC1S5	Up	None	None	None	Up	Up	Up	Up
BMP8A	Up	Up	Up	Up	None	Up	Up	None
BOLA1	None	None	None	None	None	Up	None	None
BTBD11	Up	Up	Up	None	Up	Up	Up	Up
C1RL	Down	Down	Down	Down	None	None	None	None
C2CD4A	Up	Up	None	Up	Up	Up	Up	Up
C2CD4B	None	None	None	None	None	None	Up	None
CA1H5ORF58	None	None	None	None	Up	Up	None	None
CA2H3ORF14	None	None	None	None	None	Up	None	None
CA3H20ORF173	None	None	None	None	None	None	Up	None
CA3H20ORF194	None	None	None	None	Down	Down	None	Down
CA3H20ORF204	None	None	None	None	Up	Up	Up	Up
CA3H20ORF27	Up	Up	Up	Up	None	None	Up	None
CA3H2ORF15	Up	Up	None	Up	Up	Up	None	Up
CAMK2N2	None	None	None	None	Up	Up	Up	Up
CATSPERG	Up	Up	Up	Up	Up	Up	Up	Up
CB1H4ORF36	None	None	None	None	None	Up	None	None
CB1H4ORF46	None	None	None	None	Down	Down	Down	Down
CB1H4ORF47	None	None	None	None	Up	Up	Up	Up
CB1H4ORF50	Up	Up	Up	None	Up	None	Up	None
CB2H6ORF141	None	None	None	None	None	None	None	None
CB2H6ORF226	None	None	None	None	Up	Up	None	Up
CB3H14ORF132	Up	None	Up	None	Up	Up	Up	Up
CB3H15ORF65	Up	Up	Up	Up	Up	Up	None	Up
CB4H12ORF60	Up	None	Up	None	Up	Up	None	Up
CBWD1	None	None	None	None	Up	Up	None	Up
CBY3	None	None	None	None	None	None	None	None
CC2H21ORF62	None	None	None	None	None	Up	None	None
CCDC113	Up	Up	Up	Up	Up	Up	Up	Up
CCDC13	None	None	None	None	Up	Up	Up	Up
CCDC153	None	None	None	None	Up	Up	Up	Up
CCDC168	None	None	None	None	None	None	Up	None
CCDC96	Up	Up	Up	Up	Up	Up	Up	Up
CCL25	None	None	None	None	None	None	None	None
CD1D	None	None	None	None	Up	Up	Up	Up
CD1H11ORF1	None	None	None	None	Up	Up	None	Up
CD1H11ORF65	Up	Up	None	Up	Up	Up	Up	Up
CD1H11ORF71	Up	None	None	None	Up	Up	Up	Up
CD1H11ORF96	Up	Up	Up	Up	None	None	None	None
CD2H10ORF143	Down	Down	None	Down	Down	Down	None	Down
CD2H10ORF90	None	None	Up	None	Up	Up	Up	Up
CD2H1ORF198	None	None	None	None	Down	Down	None	Down
CD3G	None	None	None	None	Up	Up	Up	Up
CD3H18ORF25	None	None	None	None	Up	Up	Up	Up
CD3H5ORF52	None	None	None	None	Up	Up	None	Up
CD4H9ORF116	Down	None	None	Down	None	None	None	None
CD4H9ORF40	None	None	None	None	Down	Down	None	Down
CD4H9ORF50	Up	Up	Up	None	Up	Up	None	None
CD4H9ORF72	None	None	None	None	None	None	Up	None
CD55	None	None	None	None	Up	Up	None	Up
CD74	Up	None	None	None	Up	Up	Up	Up
CD99	None	None	None	None	Down	Down	Down	Down
CDRT1	None	Down	None	None	None	None	None	None
CE1H17ORF107	None	Down	None	None	None	None	Up	None
CE1H17ORF58	Up	Up	Up	Up	None	None	None	None
CE1H17ORF80	Down	None	None	Down	None	None	None	None
CE1H17ORF97	Up	None	Up	None	Up	Up	Up	Up
CE1H17ORF98	Up	Up	None	Up	None	None	None	None
CE2H16ORF46	Up	Up	Up	None	Up	Up	Up	Up
CE2H16ORF74	None	None	None	None	Up	Up	Up	Up
CE2H19ORF12	Down	Down	Down	Down	Down	Down	Down	Down
CE2H19ORF54	None	Down	Down	Down	None	None	Down	None
CE2H19ORF73	Up	None	None	None	None	Up	None	Up
CE2H19ORF84	Up	Up	Up	None	None	None	Down	Down
CE3H16ORF72	None	None	None	None	None	None	Up	None
CEP164	None	None	None	None	Up	Up	Up	Up
CES1	Up	Up	None	Up	Up	None	None	None
CF1H1ORF100	None	None	None	None	Up	Up	None	Up
CF1H1ORF112	None	None	None	None	Down	Down	Down	Down
CF1H1ORF226	Up	Up	Up	Up	Up	Up	Up	Up
CF2H8ORF82	None	None	None	None	None	None	None	None
CF2H8ORF89	Down	Down	None	Down	Down	Down	Down	Down
CFAP46	None	None	Up	None	None	None	None	None
CFAP47	Up	Up	Up	Up	Up	Up	Up	Up
CFAP53	None	None	None	None	None	None	Up	None
CHML	None	None	None	None	Down	None	None	None
CHMP1B	None	None	None	None	Up	Up	Up	Up
CHRAC1	None	None	None	None	None	None	Down	None
CHRNB1	None	None	None	None	Up	None	None	None
CHST14	Down	Down	Down	Down	Down	Down	Down	Down
CHSY3	None	Up	Up	None	None	None	None	None
CLEC2B	Down	Down	None	Down	None	None	None	None
CLEC3B	None	None	None	None	Up	None	Up	Up
CMTM8	None	None	Up	None	Up	Up	Up	Up
CNGB1	None	None	None	None	None	Up	Up	None
CNR1	None	None	None	Up	None	None	None	Down
CNRIP1	Down	None	Down	None	Down	Down	Down	Down
COL7A1	None	None	None	None	Up	Up	Up	Up
COLCA2	Down	Down	Down	Down	Down	Down	Down	Down
CPHXL	Up	Up	Up	Up	Up	Up	Up	Up
CRCT1	Up	Up	None	Up	None	None	None	None
CT55	None	None	Up	None	None	None	None	None
CTNNBIP1	Up	None	Up	None	Up	Up	Up	Up
CTU1	None	None	None	None	None	None	None	None
CTXND2	None	None	Down	None	Up	Up	Up	Up
CUPIN1	None	None	None	None	Down	Down	Down	Down
CXCR2	None	None	Up	None	None	Up	Up	None
CYP1A1	Up	Up	Up	Up	Up	Up	Up	Up
DBF4B	None	None	None	None	Down	Down	None	None
DCHS1	Down	Down	Down	Down	Down	Down	Down	Down
DCTN6	None	None	None	None	Down	Down	Down	Down
DDX19A	None	None	None	None	Up	None	None	Up
DDX53	None	None	None	None	None	None	None	None
DDX58	Down	Down	Down	Down	Down	Down	None	Down
DEFB116	Up	Up	Up	Up	None	None	None	None
DERPC	None	None	None	None	None	None	Down	None
DIO3	None	Down	None	Down	None	None	None	None
DIRAS1	None	None	None	None	None	None	None	None
DMAC2L	None	None	None	None	None	Up	Up	None
DMWD	None	None	Up	None	None	None	None	None
DNAI2	Up	Up	Up	Up	None	Up	None	None
DNAJB13	None	None	None	None	Up	Up	Up	Up
DND1	None	None	None	None	None	None	Up	None
DNLZ	Down	Down	Down	Down	Down	Down	Down	Down
DPY19L1	None	None	None	None	None	None	Down	None
DSC3	Up	Up	Up	Up	None	None	None	None
DUSP18	None	None	None	None	Up	Up	None	Up
E2F5	Down	None	None	Down	Down	Down	None	None
EFCAB1	Up	Up	Up	Up	Up	Up	Up	Up
EFCC1	None	Up	Up	None	Down	Down	None	Down
EIF4EBP3	None	None	None	Down	None	None	None	None
ELK4	None	None	None	None	None	None	None	Down
ELOVL3	Up	Up	Up	Up	Up	Up	Up	Up
ELOVL7	Up	Up	None	Up	Up	Up	None	Up
ENC1	None	None	Down	None	Down	Down	Down	Down
ENHO	Up	Up	Up	Up	Up	None	Up	Up
ENSFCAG00000000001	Down	Down	None	Down	None	None	None	None
ENSFCAG00000000007	None	None	Down	None	Down	Down	Down	Down
ENSFCAG00000000015	None	None	None	None	Down	Down	None	None
ENSFCAG00000000022	Up	Up	Up	None	Up	Up	Up	Up
ENSFCAG00000000024	None	None	None	None	Up	Up	None	Up
ENSFCAG00000000028	None	Down	None	None	None	None	None	None
ENSFCAG00000000029	Up	Up	Up	Up	Up	Up	Up	Up
ENSFCAG00000000030	None	None	None	None	None	None	None	Down
ENSFCAG00000000031	None	Up	Up	None	Up	Up	Up	Up
ENSFCAG00000000032	Up	Up	Up	Up	None	None	None	None
ENSFCAG00000000034	None	None	Up	Up	None	None	Up	Up
ENSFCAG00000000038	None	None	Down	None	None	None	Down	None
ENSFCAG00000000043	Up	Up	Up	Up	Up	Up	Up	Up
ENSFCAG00000000044	None	None	None	None	Up	Up	Up	Up
ENSFCAG00000000049	Down	None	None	Down	Down	Down	None	Down
ENSFCAG00000000052	Down	Down	None	Down	Down	Down	Down	Down
ENSFCAG00000000059	Up	Up	Up	Up	Up	Up	Up	Up
ENSFCAG00000000061	Up	Up	Up	Up	None	None	Up	None
ENSFCAG00000000062	None	None	Up	None	None	None	Up	None
ENSFCAG00000000063	Up	Up	None	None	None	None	Up	Up
ENSFCAG00000000066	Up	None	Up	None	Up	Up	Up	Up
ENSFCAG00000000067	None	None	None	None	Up	Up	None	Up
ENSFCAG00000000069	None	None	None	None	Down	Down	None	Down
ENSFCAG00000000072	None	Up	Up	None	Up	Up	Up	Up
ENSFCAG00000000074	None	None	None	None	None	Down	Down	Down
ENSFCAG00000000076	None	None	None	None	Down	Down	Down	Down
ENSFCAG00000000077	None	None	None	None	None	None	None	None
ENSFCAG00000000079	None	None	Down	None	Down	Down	Down	Down
ENSFCAG00000000081	None	None	None	None	Up	Up	Up	Up
ENSFCAG00000000082	None	None	None	None	Down	Down	Down	Down
ENSFCAG00000000084	Up	None	Up	None	Up	Up	Up	Up
ENSFCAG00000000085	Up	Up	Up	Up	Up	Up	Up	Up
ENSFCAG00000000089	Up	Up	Up	Up	Up	Up	Up	Up
ENSFCAG00000000091	None	None	None	None	None	None	None	None
ENSFCAG00000000095	None	None	None	None	None	None	None	None
ENSFCAG00000000096	Up	Up	Up	Up	Up	Up	Up	Up
ENSFCAG00000000098	None	None	None	None	Up	Up	None	Up
ENSFCAG00000000105	None	None	None	None	None	None	None	None
ENSFCAG00000000113	Up	Up	Up	Up	Up	Up	Up	Up
ENSFCAG00000000115	None	None	None	None	Down	Down	Down	Down
ENSFCAG00000000118	Up	Up	None	Up	Up	Up	Up	Up
ENSFCAG00000000130	None	Down	None	Down	None	None	None	None
ENSFCAG00000000133	None	None	None	None	Down	Down	Down	Down
ENSFCAG00000000135	Down	None	Down	None	Down	Down	Down	Down
ENSFCAG00000000146	None	None	None	None	None	None	Down	None
ENSFCAG00000000150	None	None	None	None	Down	None	Down	Down
ENSFCAG00000000154	None	None	None	None	None	None	Up	None
ENSFCAG00000000158	None	Up	Up	None	Up	Up	None	Up
ENSFCAG00000000164	None	None	None	None	Up	Up	Up	Up
ENSFCAG00000000166	Up	Up	None	None	Up	Up	None	Up
ENSFCAG00000000167	None	None	None	Down	None	None	Up	None
ENSFCAG00000000169	None	None	None	None	Down	Down	None	Down
ENSFCAG00000000170	None	None	Up	None	Up	Up	Up	Up
ENSFCAG00000000171	None	None	None	None	Down	Down	Down	Down
ENSFCAG00000000174	None	None	None	Up	None	None	None	None
ENSFCAG00000000175	Down	Down	Down	Down	None	None	None	None
ENSFCAG00000000178	None	None	None	None	None	None	Up	None
ENSFCAG00000000183	Up	Up	Up	Up	Up	Up	Up	Up
ENSFCAG00000000185	None	None	None	None	None	None	None	None
ENSFCAG00000000186	None	None	None	None	None	None	None	None
ENSFCAG00000000188	Down	None	Down	None	Down	Down	Down	Down
ENSFCAG00000000190	None	None	None	None	None	None	Up	None
ENSFCAG00000000195	None	None	None	None	Up	Up	Up	Up
ENSFCAG00000000197	None	None	None	None	None	None	Up	None
ENSFCAG00000000200	Down	Down	Down	Down	Down	Down	Down	Down
ENSFCAG00000000203	Down	None	None	None	Down	Down	Down	Down
ENSFCAG00000000207	None	None	None	None	None	None	None	None
ENSFCAG00000000208	Down	Down	Down	Down	Down	Down	Down	Down
ENSFCAG00000000209	None	None	None	None	None	None	Up	None
ENSFCAG00000000211	Up	Up	None	Up	None	None	None	None
ENSFCAG00000000214	Up	Up	Up	Up	None	None	None	None
ENSFCAG00000000215	None	None	Down	None	Down	Down	None	Down
ENSFCAG00000000220	Up	Up	Up	Up	Up	Up	Up	Up
ENSFCAG00000000225	Down	Down	None	Down	Up	None	None	None
ENSFCAG00000000229	Up	Up	Up	Up	Down	Down	None	Down
ENSFCAG00000000230	None	None	None	None	Down	Down	Down	Down
ENSFCAG00000000237	Down	Down	Down	Down	Down	Down	Down	Down
ENSFCAG00000000239	None	None	None	Down	None	None	None	None
ENSFCAG00000000241	None	None	None	Down	None	Up	None	Up
ENSFCAG00000000242	Down	Down	None	Down	None	None	None	None
ENSFCAG00000000243	Up	Up	Up	None	None	None	None	None
ENSFCAG00000000244	None	None	None	None	Up	None	None	Up
ENSFCAG00000000245	Down	Down	Down	None	Up	Up	Up	Up
ENSFCAG00000000249	Down	None	None	None	Down	Down	None	Down
ENSFCAG00000000252	None	Up	None	Up	Up	None	Up	Up
ENSFCAG00000000254	None	None	None	None	Up	Up	Up	Up
ENSFCAG00000000258	None	None	None	None	None	None	Down	None
ENSFCAG00000000259	Up	Up	Up	Up	Up	Up	Up	Up
ENSFCAG00000000264	None	None	None	Down	Up	Up	Up	Up
ENSFCAG00000000265	Down	Down	Down	Down	Up	Up	None	Up
ENSFCAG00000000267	None	None	Up	None	Up	Up	Up	Up
ENSFCAG00000000268	Up	Up	Up	Up	Up	Up	Up	Up
ENSFCAG00000000270	None	None	None	None	Up	None	None	Up
ENSFCAG00000000279	None	None	None	None	Down	Down	Down	Down
ENSFCAG00000000280	None	None	None	None	None	None	None	None
ENSFCAG00000000281	Up	None	None	None	None	None	None	None
ENSFCAG00000000283	Up	Up	Up	Up	Up	Up	Up	Up
ENSFCAG00000000289	Up	Up	Up	Up	None	None	None	None
ENSFCAG00000000297	Up	Up	None	None	Up	Up	None	Up
ENSFCAG00000000299	Up	None	None	None	Up	Up	None	Up
ENSFCAG00000000300	None	None	None	None	None	None	Down	None
ENSFCAG00000000304	Down	Down	Down	Down	None	None	Down	None
ENSFCAG00000000306	Down	Down	Down	Down	Down	Down	Down	Down
ENSFCAG00000000307	Down	Down	Down	Down	Down	Down	Down	Down
ENSFCAG00000000308	None	None	Down	None	None	None	None	None
ENSFCAG00000000311	None	None	Up	None	Up	Up	Up	Up
ENSFCAG00000000316	None	None	Up	None	Up	Up	Up	Up
ENSFCAG00000000317	None	None	None	None	Up	Up	Up	None
ENSFCAG00000000318	None	None	None	None	Up	Up	Up	Up
ENSFCAG00000000320	Down	Down	Down	Down	None	None	None	None
ENSFCAG00000000321	Up	Up	Up	Up	Up	Up	Up	Up
ENSFCAG00000000322	Down	Down	Down	Down	None	Up	None	None
ENSFCAG00000000329	Down	Down	Down	Down	Down	Down	Down	Down
ENSFCAG00000000330	None	None	Up	None	Up	Up	Up	Up
ENSFCAG00000000336	None	None	None	None	Up	Up	Up	Up
ENSFCAG00000000341	None	None	None	None	None	None	Up	Up
ENSFCAG00000000348	None	None	None	None	None	None	None	None
ENSFCAG00000000350	Up	Up	Up	Up	None	None	None	None
ENSFCAG00000000351	Down	Down	Down	Down	Down	Down	Down	Down
ENSFCAG00000000352	None	None	None	None	None	None	None	None
ENSFCAG00000000354	None	None	None	None	Down	Down	Down	Down
ENSFCAG00000000359	None	None	None	None	Down	None	None	Down
ENSFCAG00000000362	Up	Up	Up	Up	Up	Up	Up	Up
ENSFCAG00000000368	None	None	None	None	None	Up	None	Up
ENSFCAG00000000370	Up	Up	Up	Up	Up	Up	Up	Up
ENSFCAG00000000371	Down	None	Down	None	Down	Down	Down	Down
ENSFCAG00000000375	None	None	None	None	Up	Up	Up	Up
ENSFCAG00000000376	None	None	Up	None	Up	Up	Up	Up
ENSFCAG00000000377	None	None	None	None	Up	None	None	None
ENSFCAG00000000379	None	None	None	None	Up	Up	Up	Up
ENSFCAG00000000383	Up	Up	Up	Up	Up	Up	Up	Up
ENSFCAG00000000386	Up	Up	Up	Up	Down	None	None	Down
ENSFCAG00000000387	None	None	None	None	Up	Up	Up	Up
ENSFCAG00000000392	None	None	None	None	None	None	Down	None
ENSFCAG00000000395	Down	Down	Down	Down	Up	Up	None	Up
ENSFCAG00000000399	Up	Up	Up	Up	Down	Down	Down	Down
ENSFCAG00000000400	Down	Down	Down	Down	Down	Down	Down	Down
ENSFCAG00000000401	Up	None	None	None	None	None	None	None
ENSFCAG00000000404	None	None	None	None	Down	Down	Down	Down
ENSFCAG00000000405	None	Down	None	None	Down	Down	Down	Down
ENSFCAG00000000407	None	None	None	None	None	None	None	None
ENSFCAG00000000408	Up	Up	Up	Up	None	None	None	None
ENSFCAG00000000411	Down	Down	Down	Down	Down	Down	Down	Down
ENSFCAG00000000413	None	None	None	None	Up	Up	Up	Up
ENSFCAG00000000419	None	None	None	Up	Up	Up	Up	Up
ENSFCAG00000000423	Down	None	Down	None	None	None	Down	Down
ENSFCAG00000000424	Up	Up	Up	Up	Up	Up	None	Up
ENSFCAG00000000425	Up	Up	Up	Up	Up	Up	Up	Up
ENSFCAG00000000430	None	None	None	None	None	None	Down	None
ENSFCAG00000000437	None	None	None	None	None	None	None	None
ENSFCAG00000000439	Up	Up	Up	Up	Up	Up	Up	Up
ENSFCAG00000000440	Up	Up	Up	Up	None	None	None	None
ENSFCAG00000000441	None	None	None	None	None	None	None	None
ENSFCAG00000000442	Up	None	None	Up	None	None	None	None
ENSFCAG00000000443	None	None	None	None	Down	Down	None	Down
ENSFCAG00000000444	None	None	None	None	Down	Down	Down	Down
ENSFCAG00000000445	None	None	None	None	None	None	Down	None
ENSFCAG00000000446	None	None	None	None	None	None	Down	None
ENSFCAG00000000448	None	None	None	None	None	None	None	Down
ENSFCAG00000000449	None	Up	None	Up	Up	Up	None	Up
ENSFCAG00000000454	Up	Up	Up	Up	Up	Up	Up	Up
ENSFCAG00000000455	None	None	None	None	Down	Down	Down	Down
ENSFCAG00000000463	None	Down	None	None	None	None	None	None
ENSFCAG00000000467	Down	Down	Down	Down	Down	Down	Down	Down
ENSFCAG00000000468	None	None	None	None	None	None	None	None
ENSFCAG00000000470	None	None	None	None	None	None	None	None
ENSFCAG00000000475	Up	Up	Up	Up	Up	Up	Up	Up
ENSFCAG00000000477	None	None	None	None	None	None	Up	None
ENSFCAG00000000481	None	None	None	None	Down	Down	Down	Down
ENSFCAG00000000483	None	Down	None	Down	None	None	None	None
ENSFCAG00000000484	Up	None	None	None	Up	None	Up	Up
ENSFCAG00000000485	None	Up	Up	None	None	None	None	None
ENSFCAG00000000486	Up	Up	Up	Up	None	None	None	None
ENSFCAG00000000492	Up	Up	Up	Up	Up	Up	None	Up
ENSFCAG00000000494	Down	Down	Down	Down	Down	Down	Down	Down
ENSFCAG00000000503	None	None	Down	None	Down	Down	Down	Down
ENSFCAG00000000511	None	Down	None	Down	Up	Up	Up	Up
ENSFCAG00000000513	Down	None	Down	None	Down	Down	Down	Down
ENSFCAG00000000514	None	None	None	None	Up	Up	Up	Up
ENSFCAG00000000515	Down	Down	Down	Down	None	None	Down	Down
ENSFCAG00000000517	Up	None	None	None	Up	Up	Up	Up
ENSFCAG00000000523	None	Down	None	None	Down	Down	Down	Down
ENSFCAG00000000531	Down	Down	None	Down	None	None	None	None
ENSFCAG00000000532	Down	Down	Down	Down	Down	Down	Down	Down
ENSFCAG00000000534	None	None	None	None	None	None	Up	None
ENSFCAG00000000541	None	None	Up	None	Down	Down	Down	Down
ENSFCAG00000000544	Up	Up	Up	Up	Up	Up	Up	Up
ENSFCAG00000000546	Down	Down	Down	Down	None	None	None	None
ENSFCAG00000000553	None	None	None	None	Up	Up	Up	Up
ENSFCAG00000000557	Down	Down	Down	Down	Down	Down	Down	Down
ENSFCAG00000000559	None	None	None	None	None	None	Up	None
ENSFCAG00000000562	Down	Down	Down	Down	Down	Down	Down	Down
ENSFCAG00000000566	None	None	None	None	None	None	None	None
ENSFCAG00000000567	None	None	None	None	None	None	None	None
ENSFCAG00000000568	None	None	None	None	None	None	None	None
ENSFCAG00000000574	None	None	Up	None	None	Up	Up	Up
ENSFCAG00000000576	None	None	None	None	Down	Down	Down	Down
ENSFCAG00000000585	Down	None	Down	None	Down	Down	Down	Down
ENSFCAG00000000586	None	None	None	None	Down	None	None	None
ENSFCAG00000000587	Up	Up	Up	Up	None	None	None	None
ENSFCAG00000000591	None	None	None	None	Down	None	None	None
ENSFCAG00000000597	Up	Up	Up	Up	Up	Up	Up	Up
ENSFCAG00000000603	None	None	None	None	Down	Down	Down	Down
ENSFCAG00000000608	None	None	None	None	Up	None	Down	Up
ENSFCAG00000000609	Down	Down	None	Down	None	None	None	None
ENSFCAG00000000612	None	None	Up	None	Up	Up	Up	Up
ENSFCAG00000000621	Up	None	None	None	Up	Up	Up	Up
ENSFCAG00000000629	None	None	None	None	None	None	None	None
ENSFCAG00000000631	None	None	None	None	Up	Up	Up	Up
ENSFCAG00000000634	None	None	None	None	Up	Up	Up	Up
ENSFCAG00000000635	None	None	None	None	Down	Down	Down	Down
ENSFCAG00000000636	None	None	None	None	None	None	Down	None
ENSFCAG00000000637	None	None	None	None	None	None	None	None
ENSFCAG00000000639	None	None	None	None	None	None	Up	None
ENSFCAG00000000643	Down	Down	Down	Down	Down	Down	Down	Down
ENSFCAG00000000646	None	None	None	None	Up	Up	None	Up
ENSFCAG00000000647	Up	Up	Up	Up	Up	Up	Up	Up
ENSFCAG00000000649	None	Up	Up	None	Up	Up	Up	Up
ENSFCAG00000000650	None	None	None	None	Up	Up	Up	Up
ENSFCAG00000000651	None	None	None	None	Down	Down	None	Down
ENSFCAG00000000653	Up	None	None	None	Up	Up	Up	Up
ENSFCAG00000000657	None	None	None	None	None	None	None	None
ENSFCAG00000000658	None	None	None	None	None	None	Down	None
ENSFCAG00000000660	None	None	None	None	Up	Up	Up	Up
ENSFCAG00000000663	None	None	None	None	None	None	Down	Down
ENSFCAG00000000667	Down	Down	Down	Down	Down	Down	Down	Down
ENSFCAG00000000669	Down	Down	None	None	Up	Up	Up	Up
ENSFCAG00000000671	None	None	None	None	None	None	None	None
ENSFCAG00000000672	None	Down	None	Down	Down	Down	Down	Down
ENSFCAG00000000678	None	None	None	None	None	None	Down	None
ENSFCAG00000000689	None	None	None	None	Down	Down	Down	Down
ENSFCAG00000000693	None	None	None	None	None	None	Down	Down
ENSFCAG00000000700	None	None	None	None	None	None	None	None
ENSFCAG00000000704	None	None	None	None	None	None	None	None
ENSFCAG00000000709	None	None	Up	None	Down	Down	Down	Down
ENSFCAG00000000713	Up	Up	Up	Up	Up	Up	None	None
ENSFCAG00000000715	Up	Up	Up	Up	Up	Up	Up	Up
ENSFCAG00000000721	None	None	None	None	None	None	None	None
ENSFCAG00000000724	Down	None	Down	Down	None	Down	Down	Down
ENSFCAG00000000725	Up	Up	Up	Up	Up	Up	Up	Up
ENSFCAG00000000730	None	None	None	None	Up	Up	Up	Up
ENSFCAG00000000734	Down	Down	None	Down	None	None	None	None
ENSFCAG00000000737	None	None	None	None	Down	Down	None	Down
ENSFCAG00000000742	None	None	None	None	Up	Up	None	Up
ENSFCAG00000000743	Down	Down	Down	Down	Down	Down	Down	Down
ENSFCAG00000000744	Up	Up	Up	Up	Up	Up	Up	Up
ENSFCAG00000000747	None	None	None	None	None	None	Up	None
ENSFCAG00000000749	None	None	None	None	None	None	Up	None
ENSFCAG00000000754	None	Up	Up	Up	None	None	Up	Up
ENSFCAG00000000758	Down	Down	Down	Down	Up	None	Up	None
ENSFCAG00000000763	None	None	None	None	Down	Down	Down	Down
ENSFCAG00000000765	None	None	None	None	None	None	None	None
ENSFCAG00000000768	None	None	Up	None	None	None	Up	Up
ENSFCAG00000000770	None	None	None	None	Down	Down	Down	Down
ENSFCAG00000000782	None	None	None	None	Down	Down	Down	Down
ENSFCAG00000000783	None	None	None	None	None	None	None	None
ENSFCAG00000000789	None	None	None	None	None	None	Up	None
ENSFCAG00000000790	None	None	None	None	None	None	None	None
ENSFCAG00000000791	None	None	None	None	Down	Down	Down	Down
ENSFCAG00000000792	None	None	None	None	Down	Down	Down	Down
ENSFCAG00000000794	None	None	None	None	Up	Up	Up	Up
ENSFCAG00000000797	Up	Up	Up	Up	Up	Up	Up	Up
ENSFCAG00000000799	Up	None	Up	None	Up	Up	Up	Up
ENSFCAG00000000800	Up	Up	Up	Up	Up	Up	Up	Up
ENSFCAG00000000801	None	None	None	None	Down	Down	Down	Down
ENSFCAG00000000804	None	None	None	None	Down	Down	None	Down
ENSFCAG00000000807	None	None	Down	None	Up	Up	None	Up
ENSFCAG00000000810	None	None	None	Up	None	None	None	None
ENSFCAG00000000813	Down	Down	Down	Down	Down	Down	Down	Down
ENSFCAG00000000814	Up	Up	None	Up	None	None	Down	None
ENSFCAG00000000816	None	None	Up	None	Up	Up	Up	Up
ENSFCAG00000000817	None	None	None	None	None	None	None	None
ENSFCAG00000000818	None	None	None	None	None	None	Down	None
ENSFCAG00000000820	None	None	None	None	Down	Down	None	Down
ENSFCAG00000000822	None	None	None	None	Up	None	None	Up
ENSFCAG00000000825	Down	None	None	Down	None	None	None	None
ENSFCAG00000000828	None	None	None	None	Up	Up	Up	Up
ENSFCAG00000000829	Up	Up	Up	Up	Up	Up	Up	Up
ENSFCAG00000000832	None	None	None	None	Down	Down	Down	Down
ENSFCAG00000000833	Up	Up	Up	Up	Up	Up	Up	Up
ENSFCAG00000000834	None	None	None	None	None	None	None	None
ENSFCAG00000000844	None	None	None	None	Down	Down	Down	Down
ENSFCAG00000000845	None	None	None	None	None	None	None	None
ENSFCAG00000000855	None	None	None	None	Down	Down	Down	Down
ENSFCAG00000000868	None	None	None	None	Up	Up	Up	Up
ENSFCAG00000000869	None	None	None	None	Down	Down	Down	Down
ENSFCAG00000000872	Down	Down	Down	Down	Down	Down	Down	Down
ENSFCAG00000000874	None	Up	Up	Up	None	None	None	None
ENSFCAG00000000877	Up	Up	Up	Up	Up	Up	Up	Up
ENSFCAG00000000880	Down	Down	Down	Down	Down	Down	Down	Down
ENSFCAG00000000882	None	None	None	None	Down	Down	None	None
ENSFCAG00000000884	None	None	None	None	Down	Down	Down	Down
ENSFCAG00000000886	None	None	None	None	None	None	Up	None
ENSFCAG00000000889	Up	Up	Up	None	Up	Up	Up	Up
ENSFCAG00000000892	None	None	None	None	None	None	None	None
ENSFCAG00000000903	None	None	Up	None	Up	Up	Up	Up
ENSFCAG00000000914	Down	None	None	None	None	None	None	None
ENSFCAG00000000921	Up	Up	Up	Up	None	Up	Up	None
ENSFCAG00000000924	None	None	None	None	Down	Down	Down	Down
ENSFCAG00000000928	Down	Down	Down	Down	Down	Down	Down	Down
ENSFCAG00000000929	None	None	Down	None	None	None	None	None
ENSFCAG00000000930	Down	Down	Down	Down	Down	Down	Down	Down
ENSFCAG00000000934	None	Up	Up	None	None	None	None	None
ENSFCAG00000000938	Down	Down	Down	Down	Down	Down	Down	Down
ENSFCAG00000000939	None	None	None	None	Up	Up	Up	Up
ENSFCAG00000000941	None	None	None	None	None	None	Up	None
ENSFCAG00000000943	None	None	None	None	None	None	None	None
ENSFCAG00000000945	Down	Down	Down	Down	Down	Down	Down	Down
ENSFCAG00000000947	Up	None	Up	Up	Up	Up	None	Up
ENSFCAG00000000954	None	None	None	None	Up	Up	Up	Up
ENSFCAG00000000956	Down	Down	Down	Down	None	None	None	None
ENSFCAG00000000959	None	None	None	None	Down	Down	None	Down
ENSFCAG00000000962	None	None	None	None	Up	Up	Up	Up
ENSFCAG00000000965	None	None	None	None	Down	Down	None	Down
ENSFCAG00000000972	None	None	Down	None	Down	Down	Down	Down
ENSFCAG00000000973	Down	Down	Down	Down	Down	Down	None	Down
ENSFCAG00000000974	Up	Up	Up	Up	Up	Up	Up	Up
ENSFCAG00000000976	None	None	None	None	None	None	None	None
ENSFCAG00000000977	Up	Up	Up	Up	None	None	None	None
ENSFCAG00000000980	None	None	None	None	Up	Up	Up	Up
ENSFCAG00000000987	None	None	None	None	None	None	Down	None
ENSFCAG00000000996	None	None	None	None	None	None	None	None
ENSFCAG00000000997	None	Down	None	None	None	None	None	None
ENSFCAG00000000998	None	None	None	None	Up	Up	Up	Up
ENSFCAG00000000999	None	None	None	None	None	Down	None	None
ENSFCAG00000001000	None	None	None	None	Up	None	None	None
ENSFCAG00000001006	None	None	Up	None	None	None	None	None
ENSFCAG00000001007	None	None	None	None	Up	Up	Up	Up
ENSFCAG00000001008	Up	Up	Up	Up	Up	Up	Up	Up
ENSFCAG00000001009	None	Down	None	Down	Up	Up	Up	Up
ENSFCAG00000001015	None	None	None	None	Down	Down	Down	Down
ENSFCAG00000001018	None	None	None	None	Down	Down	None	Down
ENSFCAG00000001024	None	None	None	None	Up	Up	Up	Up
ENSFCAG00000001025	Down	Down	Down	Down	Down	Down	Down	Down
ENSFCAG00000001027	Up	Up	Up	Up	Up	None	Up	Up
ENSFCAG00000001028	Up	None	Up	None	Up	None	None	Up
ENSFCAG00000001029	None	None	None	None	Up	Up	None	Up
ENSFCAG00000001031	None	Down	None	Down	None	None	None	None
ENSFCAG00000001032	Up	Up	Up	Up	Up	Up	Up	Up
ENSFCAG00000001033	Up	Up	Up	Up	Up	Up	Up	Up
ENSFCAG00000001034	Down	Down	Down	Down	Down	Down	Down	Down
ENSFCAG00000001039	None	None	None	None	Down	Down	None	Down
ENSFCAG00000001041	Up	None	None	None	None	None	None	None
ENSFCAG00000001045	None	None	None	None	None	None	Down	None
ENSFCAG00000001058	Up	None	Up	None	Up	Up	None	None
ENSFCAG00000001059	Up	Up	Up	Up	Up	Up	Up	Up
ENSFCAG00000001064	None	None	None	None	None	None	Up	None
ENSFCAG00000001069	None	None	None	None	None	None	Down	None
ENSFCAG00000001070	Up	Up	Up	None	None	None	None	None
ENSFCAG00000001073	Down	Down	Down	Down	None	None	Down	Down
ENSFCAG00000001075	Up	Up	Up	None	Up	Up	Up	Up
ENSFCAG00000001076	None	None	Down	None	Down	Down	None	Down
ENSFCAG00000001077	None	None	None	None	Down	Down	None	Down
ENSFCAG00000001082	None	None	None	None	Up	Up	None	Up
ENSFCAG00000001084	None	None	None	None	Down	Down	Down	Down
ENSFCAG00000001089	Up	Up	Up	Up	Up	Up	Up	Up
ENSFCAG00000001093	None	None	None	None	Down	Down	Down	Down
ENSFCAG00000001094	Up	Up	Up	Up	Up	Up	Up	Up
ENSFCAG00000001100	None	None	None	None	None	None	None	None
ENSFCAG00000001104	Down	Down	Down	None	Down	Down	Down	Down
ENSFCAG00000001105	Down	Down	Down	Down	None	None	None	None
ENSFCAG00000001106	Up	Up	Up	Up	Up	Up	Up	Up
ENSFCAG00000001108	Up	Up	Up	Up	None	None	None	None
ENSFCAG00000001120	None	None	None	None	Up	Up	None	Up
ENSFCAG00000001121	Down	Down	Down	None	None	None	None	None
ENSFCAG00000001124	None	None	None	None	None	None	Down	None
ENSFCAG00000001128	Up	Up	Up	None	None	Down	None	None
ENSFCAG00000001129	None	None	None	None	Up	None	Up	Up
ENSFCAG00000001133	Down	Down	Down	Down	Down	Down	Down	Down
ENSFCAG00000001135	Up	Up	Up	None	None	None	None	None
ENSFCAG00000001146	Down	None	Down	Down	Down	Down	Down	Down
ENSFCAG00000001147	Down	Down	Down	None	None	None	Down	None
ENSFCAG00000001153	Up	Up	Up	Up	Up	Up	Up	Up
ENSFCAG00000001159	Down	Down	Down	Down	Down	Down	Down	Down
ENSFCAG00000001161	Down	Down	Down	Down	Down	Down	None	Down
ENSFCAG00000001164	Up	Up	Up	None	None	None	Up	Up
ENSFCAG00000001165	None	None	None	None	None	None	None	None
ENSFCAG00000001166	None	Up	Up	Up	Up	Up	Up	Up
ENSFCAG00000001167	Down	Down	Down	Down	Down	Down	Down	Down
ENSFCAG00000001170	Down	Down	Down	Down	Down	Down	Down	Down
ENSFCAG00000001175	None	None	None	None	Up	Up	Up	Up
ENSFCAG00000001178	Up	None	Up	None	None	None	None	None
ENSFCAG00000001181	Down	Down	None	Down	Down	Down	Down	Down
ENSFCAG00000001182	None	None	None	None	Up	Up	Up	Up
ENSFCAG00000001186	Down	Down	Down	Down	Down	Down	Down	Down
ENSFCAG00000001187	Down	Down	None	Down	Up	Up	Up	Up
ENSFCAG00000001189	Up	Up	Up	Up	None	None	None	None
ENSFCAG00000001190	Down	None	Down	None	Up	Up	None	Up
ENSFCAG00000001191	None	None	None	None	Up	Up	None	Up
ENSFCAG00000001192	Down	Down	Down	Down	Down	Down	None	Down
ENSFCAG00000001193	None	None	None	None	Down	None	Down	Down
ENSFCAG00000001198	Up	Up	Up	Up	Up	Up	Up	Up
ENSFCAG00000001199	None	None	None	None	None	None	None	None
ENSFCAG00000001203	Up	Up	Up	Up	Up	Up	Up	Up
ENSFCAG00000001204	None	None	None	None	Down	Down	Down	Down
ENSFCAG00000001216	None	None	None	None	Down	Down	None	Down
ENSFCAG00000001219	Down	Down	Down	Down	Down	Down	Down	Down
ENSFCAG00000001220	Down	Down	Down	Down	Up	Up	None	Up
ENSFCAG00000001225	Down	Down	Down	Down	None	None	Down	None
ENSFCAG00000001226	None	None	None	None	None	None	Up	None
ENSFCAG00000001231	None	Up	Up	None	Up	Up	None	Up
ENSFCAG00000001232	Down	Down	None	Down	Up	Up	None	Up
ENSFCAG00000001234	Up	Up	Up	None	Up	Up	Up	Up
ENSFCAG00000001235	Up	Up	Up	Up	None	None	None	None
ENSFCAG00000001236	Down	Down	Down	None	Down	None	None	None
ENSFCAG00000001238	Down	Down	Down	Down	Down	Down	Down	Down
ENSFCAG00000001241	None	None	None	None	None	None	Up	None
ENSFCAG00000001242	None	None	None	None	None	None	Up	None
ENSFCAG00000001243	Up	Up	Up	None	Up	Up	Up	Up
ENSFCAG00000001245	Down	None	Down	None	None	None	Down	Down
ENSFCAG00000001248	None	None	None	None	None	None	Down	None
ENSFCAG00000001249	None	None	None	None	Up	Up	None	Up
ENSFCAG00000001251	None	None	None	None	None	None	None	None
ENSFCAG00000001256	Up	Up	Up	Up	Up	Up	Up	Up
ENSFCAG00000001257	Down	Down	Down	Down	Down	Down	Down	Down
ENSFCAG00000001258	None	None	None	None	Up	Up	Up	Up
ENSFCAG00000001259	None	None	None	None	Up	Up	Up	Up
ENSFCAG00000001266	None	None	None	None	Down	Down	None	Down
ENSFCAG00000001271	Up	Up	Up	Up	None	None	None	None
ENSFCAG00000001272	None	None	None	None	None	None	Down	Down
ENSFCAG00000001273	None	None	None	None	None	None	None	None
ENSFCAG00000001274	Up	None	Up	Up	None	None	None	None
ENSFCAG00000001276	None	None	Up	None	Up	Up	Up	Up
ENSFCAG00000001278	None	Down	None	Down	Up	Up	Up	Up
ENSFCAG00000001279	None	None	None	None	None	None	None	None
ENSFCAG00000001280	None	None	None	None	Up	Up	Up	Up
ENSFCAG00000001282	None	None	None	None	None	None	None	None
ENSFCAG00000001288	None	None	None	None	None	None	None	Up
ENSFCAG00000001289	None	None	None	None	None	None	None	None
ENSFCAG00000001290	Up	Up	Up	Up	Up	Up	None	Up
ENSFCAG00000001291	Down	Down	Down	Down	Down	Down	Down	Down
ENSFCAG00000001300	None	None	Up	None	None	None	None	None
ENSFCAG00000001301	Up	Up	Up	Up	Up	Up	Up	Up
ENSFCAG00000001312	None	None	None	Up	None	None	None	None
ENSFCAG00000001313	None	None	None	None	Down	None	Down	Down
ENSFCAG00000001314	Down	Down	Down	Down	Down	Down	Down	Down
ENSFCAG00000001315	Up	Up	Up	None	Up	Up	Up	Up
ENSFCAG00000001316	Down	Down	None	Down	Down	Down	Down	Down
ENSFCAG00000001317	None	None	None	None	Up	None	Up	Up
ENSFCAG00000001319	Down	Down	Down	Down	Down	Down	Down	Down
ENSFCAG00000001325	None	None	None	None	Down	Down	None	Down
ENSFCAG00000001331	Up	Up	Up	Up	Up	Up	Up	Up
ENSFCAG00000001332	Down	Down	None	Down	None	None	None	None
ENSFCAG00000001335	Down	Down	Down	Down	Down	Down	Down	Down
ENSFCAG00000001338	Down	Down	Down	Down	None	None	Down	None
ENSFCAG00000001343	None	None	None	None	Down	Down	None	Down
ENSFCAG00000001344	None	None	Up	None	Up	Up	Up	Up
ENSFCAG00000001352	Up	Up	Up	Up	Up	Up	Up	Up
ENSFCAG00000001354	None	None	None	None	Up	None	None	None
ENSFCAG00000001356	None	Down	None	Down	Up	Up	Up	Up
ENSFCAG00000001357	None	None	None	None	Down	Down	None	Down
ENSFCAG00000001358	Up	Up	Up	Up	Up	Up	Up	Up
ENSFCAG00000001361	Down	Down	None	None	None	None	None	None
ENSFCAG00000001367	Down	Down	Down	Down	None	None	Down	None
ENSFCAG00000001369	None	None	None	None	None	None	None	Down
ENSFCAG00000001380	None	None	Down	None	None	None	None	None
ENSFCAG00000001383	None	None	None	None	None	None	None	None
ENSFCAG00000001384	Up	Up	None	None	None	Up	Up	Up
ENSFCAG00000001385	None	None	None	None	Down	Down	None	Down
ENSFCAG00000001388	None	None	Down	None	None	None	Up	Up
ENSFCAG00000001392	None	None	None	None	None	None	None	None
ENSFCAG00000001412	None	None	None	None	Up	Up	Up	Up
ENSFCAG00000001417	Up	None	Up	Up	Up	Up	Up	Up
ENSFCAG00000001418	None	None	None	None	Up	Up	Up	Up
ENSFCAG00000001420	None	None	None	None	None	None	Down	None
ENSFCAG00000001421	Up	Up	Up	Up	Up	Up	Up	Up
ENSFCAG00000001422	None	None	None	None	Down	Down	Down	Down
ENSFCAG00000001427	None	None	None	None	Down	Down	Down	Down
ENSFCAG00000001430	None	None	None	None	Up	Up	Up	Up
ENSFCAG00000001433	Up	Up	Up	Up	Up	Up	None	Up
ENSFCAG00000001434	Down	Down	None	Down	None	None	None	None
ENSFCAG00000001438	Down	Down	Down	None	Down	Down	Down	Down
ENSFCAG00000001440	Down	Down	Down	Down	Down	Down	Down	Down
ENSFCAG00000001443	Up	Up	Up	Up	Up	Up	Up	Up
ENSFCAG00000001446	None	None	None	None	Down	Down	Down	Down
ENSFCAG00000001451	None	None	None	None	None	None	Up	None
ENSFCAG00000001452	None	None	None	None	None	Up	None	None
ENSFCAG00000001453	Up	Up	Up	Up	Up	Up	Up	Up
ENSFCAG00000001462	Up	Up	Up	Up	Up	None	None	None
ENSFCAG00000001472	None	None	None	None	None	None	Down	None
ENSFCAG00000001473	Up	Up	Up	Up	Up	Up	Up	Up
ENSFCAG00000001481	Up	Up	Up	Up	Up	Up	Up	Up
ENSFCAG00000001483	Down	Down	None	Down	None	None	None	None
ENSFCAG00000001486	Up	Up	Up	Up	Up	Up	Up	Up
ENSFCAG00000001488	None	None	None	None	None	None	None	None
ENSFCAG00000001489	Down	Down	Down	Down	Up	Up	None	Up
ENSFCAG00000001491	None	None	None	None	None	None	Down	None
ENSFCAG00000001492	Up	Up	Up	Up	Up	Up	Up	Up
ENSFCAG00000001494	None	Down	None	None	None	None	None	None
ENSFCAG00000001495	None	None	None	None	Up	Up	Up	Up
ENSFCAG00000001502	Down	None	Down	None	Down	Down	Down	Down
ENSFCAG00000001506	Up	Up	Up	Up	None	Down	None	Down
ENSFCAG00000001510	None	None	None	None	Up	Up	Up	Up
ENSFCAG00000001513	None	None	None	None	None	None	Down	None
ENSFCAG00000001514	None	None	None	None	None	None	None	Up
ENSFCAG00000001515	None	None	None	None	None	None	None	None
ENSFCAG00000001517	None	None	None	None	Up	Up	Up	Up
ENSFCAG00000001520	Up	Up	Up	Up	Up	Up	Up	Up
ENSFCAG00000001523	None	None	None	None	Down	Down	Down	Down
ENSFCAG00000001529	None	None	None	None	None	None	None	None
ENSFCAG00000001531	Down	Down	Down	Down	Down	Down	Down	Down
ENSFCAG00000001532	None	None	Down	None	None	None	None	None
ENSFCAG00000001535	None	None	Up	None	Up	Up	Up	Up
ENSFCAG00000001538	None	None	None	Up	None	None	None	None
ENSFCAG00000001540	None	None	Down	None	Down	Down	Down	Down
ENSFCAG00000001542	None	None	None	None	None	None	None	None
ENSFCAG00000001547	Down	Down	Down	Down	Down	Down	Down	Down
ENSFCAG00000001551	Up	Up	Up	None	Up	Up	None	Up
ENSFCAG00000001556	None	None	None	None	None	None	None	None
ENSFCAG00000001564	Up	Up	Up	None	Down	Down	Down	Down
ENSFCAG00000001566	Up	Up	Up	None	Up	Up	Up	Up
ENSFCAG00000001567	None	Up	Up	None	Up	Up	Up	Up
ENSFCAG00000001572	Down	None	Down	None	Down	Down	Down	Down
ENSFCAG00000001578	Up	Up	Up	Up	Up	Up	Up	Up
ENSFCAG00000001579	Down	None	Down	None	Down	Down	Down	Down
ENSFCAG00000001580	None	None	None	None	Down	Down	Down	Down
ENSFCAG00000001581	Up	Up	Up	None	None	None	Up	None
ENSFCAG00000001583	None	None	None	None	Down	Down	Down	Down
ENSFCAG00000001585	Up	Up	Up	Up	Up	Up	Up	Up
ENSFCAG00000001588	Up	Up	Up	Up	Down	Down	Down	Down
ENSFCAG00000001601	Up	Up	Up	Up	Up	Up	Up	Up
ENSFCAG00000001602	Up	Up	Up	Up	Up	Up	Up	Up
ENSFCAG00000001605	Down	Down	Down	None	Down	Down	Down	Down
ENSFCAG00000001606	None	None	None	None	Up	Up	None	Up
ENSFCAG00000001619	None	None	None	None	Down	Down	Down	None
ENSFCAG00000001621	Up	Up	Up	Up	Up	Up	None	Up
ENSFCAG00000001625	Up	None	None	None	Up	Up	Up	Up
ENSFCAG00000001627	Down	None	Down	Down	None	None	Down	Down
ENSFCAG00000001628	Down	Down	Down	Down	Up	Up	Up	Up
ENSFCAG00000001633	Up	Up	Up	Up	None	None	Down	None
ENSFCAG00000001639	None	None	None	None	Up	Up	None	Up
ENSFCAG00000001642	None	None	None	None	Down	Down	None	Down
ENSFCAG00000001652	None	Up	Up	None	None	None	None	None
ENSFCAG00000001655	None	None	Up	None	Up	None	None	None
ENSFCAG00000001656	None	None	None	None	None	None	None	None
ENSFCAG00000001657	None	None	Up	None	None	None	None	None
ENSFCAG00000001658	None	None	Up	None	Up	Up	None	Up
ENSFCAG00000001663	Up	Up	Up	None	Up	Up	Up	Up
ENSFCAG00000001669	None	None	None	None	Down	Down	Down	Down
ENSFCAG00000001674	None	None	None	None	Down	Down	None	None
ENSFCAG00000001684	Down	None	None	None	None	Up	Up	None
ENSFCAG00000001690	None	Up	Up	None	None	None	None	None
ENSFCAG00000001691	None	None	Up	None	None	None	None	None
ENSFCAG00000001693	None	None	None	None	None	None	None	None
ENSFCAG00000001706	Down	None	None	None	Down	Down	Down	Down
ENSFCAG00000001707	Up	Up	Up	Up	Up	Up	None	Up
ENSFCAG00000001709	None	None	None	None	Down	Down	None	None
ENSFCAG00000001710	Down	Down	Down	None	Down	Down	Down	Down
ENSFCAG00000001711	None	None	None	None	Down	Down	None	Down
ENSFCAG00000001712	None	None	None	None	Down	Down	Down	Down
ENSFCAG00000001714	None	None	Up	None	None	None	None	None
ENSFCAG00000001715	Down	None	Down	None	Down	Down	Down	Down
ENSFCAG00000001720	None	None	None	None	None	None	None	None
ENSFCAG00000001721	None	None	None	None	None	None	Down	None
ENSFCAG00000001726	None	None	None	None	None	None	None	None
ENSFCAG00000001727	None	None	None	None	None	None	Up	None
ENSFCAG00000001731	Up	None	None	None	Up	Up	None	Up
ENSFCAG00000001732	Down	Down	Down	Down	Down	Down	Down	Down
ENSFCAG00000001733	None	None	Up	None	Up	Up	Up	Up
ENSFCAG00000001734	None	None	None	None	Down	Down	Down	Down
ENSFCAG00000001740	Up	Up	Up	Up	None	None	None	None
ENSFCAG00000001741	None	None	None	None	Down	Down	Down	Down
ENSFCAG00000001748	Down	Down	Down	Down	Down	Down	Down	Down
ENSFCAG00000001751	None	None	Up	None	None	None	None	None
ENSFCAG00000001755	Up	Up	None	Up	Up	Up	None	Up
ENSFCAG00000001765	None	None	None	None	Up	None	None	None
ENSFCAG00000001772	Up	Up	Up	Up	Up	Up	Up	Up
ENSFCAG00000001780	Down	Down	Down	Down	Down	Down	Down	Down
ENSFCAG00000001784	Up	None	Up	None	Up	Up	Up	Up
ENSFCAG00000001785	None	Down	None	Down	Up	Up	Up	Up
ENSFCAG00000001786	None	None	None	None	Up	Up	Up	Up
ENSFCAG00000001789	None	None	None	None	None	None	None	Up
ENSFCAG00000001793	None	None	None	None	None	None	Up	None
ENSFCAG00000001804	Down	None	Down	Down	None	None	Up	None
ENSFCAG00000001812	None	None	None	None	Down	Down	Down	Down
ENSFCAG00000001813	None	None	None	None	None	Up	Up	None
ENSFCAG00000001815	Down	Down	Down	Down	Down	Down	Down	Down
ENSFCAG00000001819	Down	Down	Down	Down	Down	Down	Down	Down
ENSFCAG00000001820	None	None	None	Up	None	Up	Up	None
ENSFCAG00000001822	None	None	None	None	None	None	None	None
ENSFCAG00000001825	None	None	None	None	Up	Up	Up	Up
ENSFCAG00000001827	None	None	None	None	None	None	None	None
ENSFCAG00000001828	None	None	None	None	Up	None	None	Up
ENSFCAG00000001829	None	None	None	None	Up	Up	Up	Up
ENSFCAG00000001831	Up	Up	Up	Up	Up	Up	Up	Up
ENSFCAG00000001833	None	None	None	None	Up	Up	Up	Up
ENSFCAG00000001834	Down	Down	Down	Down	None	None	None	None
ENSFCAG00000001836	Up	Up	Up	Up	Up	Up	Up	None
ENSFCAG00000001843	Down	Down	Down	Down	None	None	None	None
ENSFCAG00000001845	Down	Down	None	Down	None	Down	Down	Down
ENSFCAG00000001858	Up	Up	Up	Up	Up	Up	Up	Up
ENSFCAG00000001859	None	None	None	None	Up	Up	None	Up
ENSFCAG00000001861	None	None	None	None	Up	None	None	None
ENSFCAG00000001863	Down	None	Down	None	None	None	Down	None
ENSFCAG00000001865	None	None	None	None	None	None	Up	None
ENSFCAG00000001868	Down	None	Down	None	Down	Down	Down	Down
ENSFCAG00000001870	None	None	None	None	None	None	Up	None
ENSFCAG00000001873	Up	Up	Up	Up	None	Up	Up	None
ENSFCAG00000001880	Down	Down	Down	Down	Down	Down	Down	Down
ENSFCAG00000001882	Up	Up	Up	Up	None	None	None	None
ENSFCAG00000001884	None	None	None	None	None	None	None	None
ENSFCAG00000001885	None	Down	Down	Down	Down	Down	Down	Down
ENSFCAG00000001886	None	None	None	None	Up	Up	Up	None
ENSFCAG00000001890	None	None	None	None	Up	Up	None	Up
ENSFCAG00000001891	None	None	None	Down	None	Up	None	None
ENSFCAG00000001896	Down	Down	Down	Down	None	None	None	Down
ENSFCAG00000001898	None	None	None	None	Down	Down	Down	Down
ENSFCAG00000001899	None	None	None	None	None	None	Down	None
ENSFCAG00000001900	Down	Down	Down	Down	Up	Up	Up	Up
ENSFCAG00000001901	Up	Up	Up	Up	Up	Up	None	None
ENSFCAG00000001902	Up	Up	Up	Up	Up	Up	Up	Up
ENSFCAG00000001904	None	None	None	None	Up	Up	None	Up
ENSFCAG00000001905	None	None	None	None	Down	Down	Down	Down
ENSFCAG00000001908	None	None	None	None	Down	Down	Down	Down
ENSFCAG00000001911	Up	Up	Up	Up	None	Up	None	None
ENSFCAG00000001913	None	None	None	None	Up	Up	Up	Up
ENSFCAG00000001918	None	None	None	None	None	None	None	None
ENSFCAG00000001929	None	None	None	None	Down	None	Down	Down
ENSFCAG00000001930	None	None	None	None	Up	Up	Up	None
ENSFCAG00000001932	Up	Up	Up	Up	Up	Up	Up	Up
ENSFCAG00000001933	Up	Up	Up	Up	Up	Up	None	Up
ENSFCAG00000001936	None	None	None	None	Down	Down	Down	Down
ENSFCAG00000001940	None	None	None	None	Up	Up	Up	Up
ENSFCAG00000001944	None	None	None	None	None	None	None	None
ENSFCAG00000001946	None	None	Up	None	Up	Up	Up	Up
ENSFCAG00000001947	None	None	None	None	Up	Up	Up	Up
ENSFCAG00000001948	Up	Up	Up	Up	Up	Up	Up	Up
ENSFCAG00000001949	Down	Down	Down	Down	Down	Down	Down	Down
ENSFCAG00000001955	Up	Up	Up	Up	None	None	None	None
ENSFCAG00000001960	Up	None	Up	None	Up	None	Up	Up
ENSFCAG00000001962	None	None	None	None	None	None	None	None
ENSFCAG00000001969	None	None	None	None	Down	Down	Down	Down
ENSFCAG00000001972	None	None	None	None	None	None	Up	None
ENSFCAG00000001973	None	None	None	None	Up	Up	Up	Up
ENSFCAG00000001977	Down	None	None	Down	Down	Down	Down	Down
ENSFCAG00000001979	Up	None	Up	None	None	None	None	None
ENSFCAG00000001981	Up	Up	None	Up	None	None	None	None
ENSFCAG00000001982	Down	Down	Down	Down	Down	Down	Down	Down
ENSFCAG00000001983	Up	Up	Up	Up	Up	None	None	None
ENSFCAG00000001984	None	None	None	None	Up	Up	None	Up
ENSFCAG00000001986	None	None	None	None	None	None	Up	None
ENSFCAG00000001995	Down	Down	Down	Down	Down	Down	Down	Down
ENSFCAG00000001999	Up	Up	Up	Up	None	None	Up	None
ENSFCAG00000002000	Down	None	None	None	None	None	Up	None
ENSFCAG00000002001	None	None	None	None	Up	Up	Up	Up
ENSFCAG00000002009	Down	None	Down	None	None	None	Up	None
ENSFCAG00000002011	Down	Down	Down	Down	Down	Down	Down	Down
ENSFCAG00000002012	None	None	None	Up	Up	Up	Up	Up
ENSFCAG00000002019	None	None	None	None	None	None	None	None
ENSFCAG00000002022	None	None	None	None	None	None	None	None
ENSFCAG00000002029	None	None	Up	Up	Up	Up	Up	Up
ENSFCAG00000002041	Down	Down	Down	Down	Down	Down	Down	Down
ENSFCAG00000002042	Up	Up	Up	Up	Up	Up	Up	Up
ENSFCAG00000002051	Down	Down	Down	Down	None	None	Up	None
ENSFCAG00000002054	Up	Up	Up	Up	Up	Up	Up	Up
ENSFCAG00000002057	None	None	None	None	None	None	Up	None
ENSFCAG00000002060	None	None	None	None	None	None	Down	None
ENSFCAG00000002061	Down	Down	Down	Down	Up	Up	None	Up
ENSFCAG00000002066	Up	Up	Up	Up	Up	Up	Up	Up
ENSFCAG00000002067	Up	Up	Up	Up	Up	Up	Up	Up
ENSFCAG00000002068	Up	Up	None	None	Up	Up	None	Up
ENSFCAG00000002071	None	None	None	None	None	Up	None	None
ENSFCAG00000002072	None	None	None	None	None	None	Up	None
ENSFCAG00000002076	None	None	None	None	Up	Up	Up	Up
ENSFCAG00000002077	None	None	Up	None	Down	Down	Down	Down
ENSFCAG00000002078	Up	Up	Up	Up	Up	Up	None	Up
ENSFCAG00000002082	None	None	None	None	Up	Up	None	Up
ENSFCAG00000002084	Up	Up	Up	Up	Up	Up	Up	Up
ENSFCAG00000002087	Up	Up	Up	Up	Up	Up	Up	Up
ENSFCAG00000002088	Down	Down	Down	Down	None	None	Down	None
ENSFCAG00000002090	Up	Up	Up	Up	Up	Up	None	Up
ENSFCAG00000002091	None	Down	Down	None	None	None	None	None
ENSFCAG00000002093	Down	Down	Down	Down	Down	Down	Down	Down
ENSFCAG00000002096	None	None	None	None	Up	Up	Up	Up
ENSFCAG00000002097	None	None	None	None	None	None	Down	None
ENSFCAG00000002102	Up	Up	Up	Up	Up	Up	Up	Up
ENSFCAG00000002105	None	None	None	None	Up	Up	None	Up
ENSFCAG00000002107	None	None	None	None	Up	Up	Up	Up
ENSFCAG00000002112	None	Down	None	Down	None	Down	Down	Down
ENSFCAG00000002118	Down	Down	Down	Down	Up	Up	Up	Up
ENSFCAG00000002120	Up	Up	Up	None	Up	Up	Up	Up
ENSFCAG00000002122	None	None	None	None	None	Down	Down	Down
ENSFCAG00000002130	Down	Down	Down	Down	Down	Down	None	Down
ENSFCAG00000002134	Up	Up	Up	Up	Up	Up	Up	Up
ENSFCAG00000002135	Down	None	Down	None	None	Down	Down	None
ENSFCAG00000002138	None	None	None	None	Down	Down	None	Down
ENSFCAG00000002140	Up	None	None	Up	None	None	None	None
ENSFCAG00000002141	None	None	None	None	Up	Up	Up	Up
ENSFCAG00000002142	None	None	None	None	None	None	Down	None
ENSFCAG00000002145	Down	Down	Down	Down	Down	Down	Down	Down
ENSFCAG00000002149	Up	Up	Up	Up	Up	Up	Up	None
ENSFCAG00000002151	None	None	None	None	Up	Up	Up	Up
ENSFCAG00000002153	Down	Down	Down	Down	Down	Down	Down	Down
ENSFCAG00000002155	Down	Down	None	Down	None	None	None	None
ENSFCAG00000002156	None	None	None	None	Down	Down	Down	Down
ENSFCAG00000002161	Up	Up	Up	Up	None	None	None	None
ENSFCAG00000002162	Up	Up	Up	Up	Up	Up	Up	Up
ENSFCAG00000002167	None	None	None	None	None	None	None	None
ENSFCAG00000002168	None	None	None	None	None	None	None	None
ENSFCAG00000002170	None	None	Up	None	Up	Up	Up	Up
ENSFCAG00000002177	None	Down	None	Down	None	None	None	None
ENSFCAG00000002180	Up	None	None	None	Up	Up	None	Up
ENSFCAG00000002193	Up	Up	Up	Up	Up	Up	Up	Up
ENSFCAG00000002195	None	None	None	None	None	None	None	None
ENSFCAG00000002198	None	None	None	None	Up	Up	None	Up
ENSFCAG00000002199	None	None	None	None	None	None	Up	None
ENSFCAG00000002203	None	Up	Up	None	None	None	None	None
ENSFCAG00000002210	None	None	None	None	Down	None	None	Down
ENSFCAG00000002211	None	None	None	None	None	None	Down	None
ENSFCAG00000002214	None	None	None	None	None	None	None	None
ENSFCAG00000002222	None	None	None	None	Down	Down	Down	Down
ENSFCAG00000002226	None	None	None	None	None	None	None	None
ENSFCAG00000002227	None	None	None	None	None	None	None	None
ENSFCAG00000002229	None	None	None	None	None	None	None	None
ENSFCAG00000002230	Down	Down	Down	Down	Down	Down	Down	Down
ENSFCAG00000002234	None	None	None	None	None	Up	None	Up
ENSFCAG00000002235	None	None	None	None	Up	Up	Up	Up
ENSFCAG00000002239	None	None	Down	None	Up	Up	Down	Up
ENSFCAG00000002245	Down	Down	Down	None	Down	Down	Down	Down
ENSFCAG00000002250	None	None	None	None	Down	Down	Down	Down
ENSFCAG00000002252	None	None	None	None	None	None	None	Down
ENSFCAG00000002255	None	None	None	None	Down	Down	Down	Down
ENSFCAG00000002257	Down	Down	Down	Down	Up	Up	Up	Up
ENSFCAG00000002260	None	None	None	None	Down	Down	None	Down
ENSFCAG00000002263	Up	Up	None	Up	Up	Up	Up	Up
ENSFCAG00000002264	None	None	None	None	Down	Down	Down	Down
ENSFCAG00000002265	None	None	None	None	None	Down	Down	Down
ENSFCAG00000002269	None	None	None	None	Down	Down	Down	Down
ENSFCAG00000002272	None	None	None	None	None	None	Down	None
ENSFCAG00000002273	None	None	None	Down	Up	Up	Up	Up
ENSFCAG00000002274	None	None	None	None	Down	Down	Down	Down
ENSFCAG00000002276	None	None	None	None	Down	None	Down	Down
ENSFCAG00000002278	Down	Down	Down	Down	Down	Down	Down	Down
ENSFCAG00000002281	Up	Up	Up	None	Down	Down	Down	Down
ENSFCAG00000002282	None	None	Down	None	Down	Down	Down	Down
ENSFCAG00000002283	None	None	None	None	None	None	None	None
ENSFCAG00000002284	None	None	None	None	None	None	None	None
ENSFCAG00000002285	None	None	None	None	Up	Up	None	Up
ENSFCAG00000002286	None	None	None	None	None	None	None	None
ENSFCAG00000002300	None	None	None	None	None	Up	Up	Up
ENSFCAG00000002305	None	None	None	None	Down	None	Down	Down
ENSFCAG00000002306	None	None	None	None	Down	Down	Down	Down
ENSFCAG00000002309	None	None	None	None	Down	None	None	None
ENSFCAG00000002310	None	None	None	None	None	None	None	None
ENSFCAG00000002312	None	None	None	None	Down	Down	Down	Down
ENSFCAG00000002313	None	None	None	None	None	None	None	None
ENSFCAG00000002314	Down	Down	Down	Down	None	None	Down	None
ENSFCAG00000002316	Up	Up	Up	Up	Up	Up	Up	Up
ENSFCAG00000002323	None	None	None	Down	None	None	None	None
ENSFCAG00000002325	None	None	None	None	Up	Up	Up	Up
ENSFCAG00000002327	None	None	None	None	Down	Down	Down	Down
ENSFCAG00000002331	None	None	None	Up	None	None	Up	None
ENSFCAG00000002334	Up	Up	Up	Up	Up	Up	Up	Up
ENSFCAG00000002335	None	None	None	None	Up	Up	Up	Up
ENSFCAG00000002336	None	Up	None	Up	Up	Up	Up	Up
ENSFCAG00000002339	None	None	None	None	Down	Down	None	None
ENSFCAG00000002340	None	None	None	None	Up	Up	Up	Up
ENSFCAG00000002357	None	None	None	None	Up	None	None	None
ENSFCAG00000002364	None	None	Up	None	Up	Up	Up	Up
ENSFCAG00000002367	None	None	None	None	None	None	Up	None
ENSFCAG00000002372	None	None	None	None	Up	Up	Up	Up
ENSFCAG00000002373	None	None	None	None	Up	Up	Up	Up
ENSFCAG00000002376	Up	Up	Up	None	Up	Up	None	Up
ENSFCAG00000002377	None	None	None	None	Up	Up	Up	Up
ENSFCAG00000002378	Down	Down	Down	Down	Down	Down	Down	Down
ENSFCAG00000002379	Up	Up	Up	Up	Up	None	Up	None
ENSFCAG00000002384	None	None	None	None	None	None	None	None
ENSFCAG00000002386	Down	Down	Down	Down	None	None	Down	Down
ENSFCAG00000002388	None	None	None	None	Up	None	None	None
ENSFCAG00000002390	None	Down	None	Down	Up	Up	None	None
ENSFCAG00000002398	None	None	None	None	Up	Up	Up	Up
ENSFCAG00000002406	None	None	None	None	Up	Up	Up	Up
ENSFCAG00000002420	None	None	Up	None	None	None	None	None
ENSFCAG00000002423	None	None	None	None	Down	Down	Down	Down
ENSFCAG00000002427	Down	Down	Down	Down	Down	Down	Down	Down
ENSFCAG00000002429	Up	Up	Up	Up	Up	Up	Up	Up
ENSFCAG00000002431	None	None	None	None	Down	Down	None	Down
ENSFCAG00000002434	None	None	None	None	Down	None	Down	Down
ENSFCAG00000002436	Up	Up	Up	Up	Up	Up	Up	Up
ENSFCAG00000002438	None	None	None	None	None	None	Up	None
ENSFCAG00000002440	Up	Up	Up	Up	None	None	Up	None
ENSFCAG00000002441	Down	None	Down	None	Down	Down	Down	Down
ENSFCAG00000002447	None	None	None	None	None	None	Up	None
ENSFCAG00000002452	Up	Up	Up	Up	Up	Up	Up	Up
ENSFCAG00000002454	Down	Down	Down	Down	Down	Down	Down	Down
ENSFCAG00000002455	None	None	None	None	None	None	Down	None
ENSFCAG00000002457	None	None	None	None	None	None	Down	None
ENSFCAG00000002460	None	None	Down	None	Up	Up	Up	Up
ENSFCAG00000002467	Down	None	None	Down	Down	Down	Down	Down
ENSFCAG00000002468	Up	Up	Up	None	None	None	None	None
ENSFCAG00000002474	Up	Up	Up	Up	Up	Up	Up	Up
ENSFCAG00000002476	Down	Down	Down	Down	None	None	Down	Down
ENSFCAG00000002477	None	None	Up	None	Up	Up	Up	Up
ENSFCAG00000002479	Up	Up	Up	Up	Up	Up	Up	Up
ENSFCAG00000002481	None	None	Up	Up	None	None	Up	None
ENSFCAG00000002485	Up	Up	None	Up	None	None	None	None
ENSFCAG00000002492	None	None	None	None	Up	Up	Up	Up
ENSFCAG00000002493	Up	Up	Up	Up	Up	Up	Up	Up
ENSFCAG00000002497	None	None	None	None	Down	Down	Down	Down
ENSFCAG00000002498	None	None	None	None	Down	Down	None	Down
ENSFCAG00000002504	None	None	None	None	None	None	Down	None
ENSFCAG00000002508	None	None	None	None	None	None	Down	None
ENSFCAG00000002514	None	None	None	None	Down	None	Down	Down
ENSFCAG00000002516	None	None	None	None	Up	Up	None	Up
ENSFCAG00000002517	Down	Down	None	Down	Down	Down	Down	Down
ENSFCAG00000002518	Down	Down	Down	Down	None	None	None	None
ENSFCAG00000002520	Down	Down	Down	Down	Down	Down	Down	Down
ENSFCAG00000002522	None	None	None	None	None	None	Up	None
ENSFCAG00000002523	None	Up	Up	Up	None	None	None	None
ENSFCAG00000002525	None	None	Down	None	Down	Down	Down	Down
ENSFCAG00000002528	None	None	None	None	Up	Up	Up	Up
ENSFCAG00000002529	None	None	None	None	None	None	Up	None
ENSFCAG00000002530	None	None	Down	Down	Up	Up	Up	Up
ENSFCAG00000002534	None	None	None	None	None	None	Up	None
ENSFCAG00000002540	Up	Up	Up	Up	Up	Up	Up	Up
ENSFCAG00000002544	Up	Up	Up	Up	Up	Up	Up	Up
ENSFCAG00000002545	None	None	None	None	Up	Up	None	Up
ENSFCAG00000002553	None	Down	None	Down	None	None	None	None
ENSFCAG00000002554	None	None	None	None	None	None	Up	None
ENSFCAG00000002555	Up	Up	Up	Up	None	None	None	None
ENSFCAG00000002559	None	None	None	None	Up	None	None	Up
ENSFCAG00000002566	None	None	None	None	Down	Down	Down	Down
ENSFCAG00000002570	None	None	None	None	None	None	None	None
ENSFCAG00000002571	None	None	None	None	None	None	None	None
ENSFCAG00000002573	None	None	None	None	Up	Up	Up	Up
ENSFCAG00000002574	None	None	None	None	None	None	None	None
ENSFCAG00000002577	None	None	None	None	Up	Up	Up	Up
ENSFCAG00000002579	Up	None	Up	Up	Up	Up	Up	Up
ENSFCAG00000002580	None	None	None	None	None	None	None	None
ENSFCAG00000002581	Up	Up	Up	Up	Up	None	Up	Up
ENSFCAG00000002582	None	None	None	None	Down	Down	Down	Down
ENSFCAG00000002593	Up	Up	Up	Up	Up	Up	Up	Up
ENSFCAG00000002594	Down	Down	Down	None	Down	Down	Down	Down
ENSFCAG00000002595	None	None	None	None	Down	Down	Down	Down
ENSFCAG00000002598	None	None	None	None	Up	None	None	Up
ENSFCAG00000002602	Up	None	Up	Up	Up	Up	Up	Up
ENSFCAG00000002605	None	None	None	None	Down	Down	Down	Down
ENSFCAG00000002617	Down	Down	Down	Down	Down	Down	Down	Down
ENSFCAG00000002625	Up	Up	Up	Up	Up	Up	Up	Up
ENSFCAG00000002626	Down	Down	Down	Down	Down	Down	Down	Down
ENSFCAG00000002633	Up	Up	Up	Up	Up	Up	Up	Up
ENSFCAG00000002634	None	None	None	None	Down	Down	None	Down
ENSFCAG00000002636	None	None	None	None	Up	Up	None	Up
ENSFCAG00000002639	None	None	Up	None	Up	None	Up	Up
ENSFCAG00000002640	None	Down	Down	Down	None	Down	Down	None
ENSFCAG00000002641	None	None	Down	None	Up	Up	Up	Up
ENSFCAG00000002648	Up	None	Up	None	Up	Up	Up	Up
ENSFCAG00000002652	None	None	None	None	None	None	None	None
ENSFCAG00000002654	None	None	None	None	None	Up	Up	None
ENSFCAG00000002656	Down	Down	Down	Down	Down	Down	Down	Down
ENSFCAG00000002657	None	None	Up	None	None	None	None	None
ENSFCAG00000002658	None	None	None	None	None	None	None	None
ENSFCAG00000002659	Up	Up	Up	Up	Up	Up	Up	Up
ENSFCAG00000002664	Down	Down	Down	Down	Down	Down	Down	Down
ENSFCAG00000002671	Up	None	Up	None	Up	Up	Up	Up
ENSFCAG00000002672	None	None	None	None	Up	Up	None	Up
ENSFCAG00000002673	Up	Up	Up	None	Up	Up	Up	Up
ENSFCAG00000002676	Up	Up	Up	None	Up	Up	None	None
ENSFCAG00000002677	None	None	None	None	Down	Down	Down	Down
ENSFCAG00000002679	None	None	Up	None	None	None	None	None
ENSFCAG00000002680	None	None	None	None	Up	Up	None	Up
ENSFCAG00000002682	Down	Down	Down	Down	Down	Down	Down	Down
ENSFCAG00000002684	Down	Down	Down	Down	Down	Down	Down	Down
ENSFCAG00000002686	None	None	Up	None	None	None	None	None
ENSFCAG00000002687	None	None	None	Up	None	None	Up	None
ENSFCAG00000002689	None	None	None	None	None	None	None	None
ENSFCAG00000002694	None	None	None	None	Down	Down	None	Down
ENSFCAG00000002704	Up	None	Up	None	None	None	None	None
ENSFCAG00000002706	None	None	None	None	Up	Up	None	Up
ENSFCAG00000002708	Down	Down	Down	Down	None	None	None	None
ENSFCAG00000002712	Down	Down	Down	Down	None	None	None	None
ENSFCAG00000002716	None	None	None	None	Up	Up	Up	Up
ENSFCAG00000002719	None	Up	None	None	Up	Up	Up	Up
ENSFCAG00000002733	None	None	None	None	Down	Down	None	Down
ENSFCAG00000002740	None	None	None	None	None	None	Down	None
ENSFCAG00000002741	Up	Up	Up	Up	Up	Up	Up	Up
ENSFCAG00000002742	Up	Up	Up	Up	Up	Up	Up	Up
ENSFCAG00000002743	Down	Down	Down	Down	None	None	Down	None
ENSFCAG00000002747	None	None	Up	None	Up	None	Up	None
ENSFCAG00000002750	None	None	None	None	None	None	None	None
ENSFCAG00000002756	None	None	Up	None	None	None	Up	Up
ENSFCAG00000002758	None	None	None	None	None	None	Up	None
ENSFCAG00000002759	None	None	Up	None	None	None	None	None
ENSFCAG00000002760	None	None	None	None	Up	Up	Up	Up
ENSFCAG00000002762	Up	Up	Up	Up	None	None	Up	None
ENSFCAG00000002763	Down	Down	Down	Down	Down	Down	Down	None
ENSFCAG00000002776	None	None	None	None	Up	None	None	None
ENSFCAG00000002779	Up	Up	Up	None	Up	Up	Up	Up
ENSFCAG00000002782	None	None	None	None	Down	Down	None	Down
ENSFCAG00000002786	Down	Down	None	Down	Down	Down	Down	Down
ENSFCAG00000002794	Down	Down	Down	Down	Down	None	None	Down
ENSFCAG00000002797	None	None	None	None	None	None	Down	None
ENSFCAG00000002809	None	None	None	None	None	None	Down	None
ENSFCAG00000002811	Up	None	None	None	None	None	None	Up
ENSFCAG00000002812	Up	None	Up	None	Up	Up	Up	Up
ENSFCAG00000002816	None	None	None	None	Down	Down	Down	Down
ENSFCAG00000002819	Up	Up	Up	None	Up	Up	Up	Up
ENSFCAG00000002822	None	None	None	None	Up	Up	Up	Up
ENSFCAG00000002824	Down	Down	Down	Down	Down	Down	Down	Down
ENSFCAG00000002827	None	None	None	None	Up	None	Up	Up
ENSFCAG00000002828	Up	Up	Up	Up	Up	Up	Up	Up
ENSFCAG00000002832	Up	None	None	None	None	None	None	None
ENSFCAG00000002835	None	None	Down	None	None	None	None	None
ENSFCAG00000002836	None	None	None	None	Up	Up	Up	Up
ENSFCAG00000002841	Down	Down	None	Down	None	None	Up	None
ENSFCAG00000002843	Up	Up	Up	Up	Up	Up	Up	Up
ENSFCAG00000002845	None	None	None	None	Down	Down	Down	Down
ENSFCAG00000002847	None	None	None	None	None	Down	None	None
ENSFCAG00000002850	None	None	None	None	None	None	Up	None
ENSFCAG00000002851	Up	Up	Up	Up	Up	Up	None	Up
ENSFCAG00000002857	None	None	Down	None	Down	Down	Down	Down
ENSFCAG00000002859	None	None	None	None	Down	Down	Down	Down
ENSFCAG00000002860	Up	Up	Up	None	Up	Up	Up	Up
ENSFCAG00000002861	Up	Up	Up	None	Up	Up	Up	Up
ENSFCAG00000002863	Up	Up	Up	Up	Up	Up	Up	Up
ENSFCAG00000002868	Down	Down	Down	Down	Down	Down	Down	Down
ENSFCAG00000002869	None	None	None	None	None	None	Up	None
ENSFCAG00000002879	None	None	None	None	Down	Down	Down	Down
ENSFCAG00000002886	None	None	None	None	None	None	Down	Down
ENSFCAG00000002890	Up	Up	Up	Up	Up	Up	Up	Up
ENSFCAG00000002892	Up	Up	Up	Up	Up	Up	Up	Up
ENSFCAG00000002897	None	None	None	None	Up	None	Up	Up
ENSFCAG00000002900	None	None	None	None	Down	Down	Down	Down
ENSFCAG00000002901	Up	Up	Up	Up	Up	Up	Up	Up
ENSFCAG00000002902	Up	Up	Up	Up	Up	Up	Up	Up
ENSFCAG00000002911	Up	Up	Up	Up	None	Up	Up	Up
ENSFCAG00000002913	Up	Up	Up	Up	Up	Up	Up	Up
ENSFCAG00000002920	None	None	None	None	None	None	None	None
ENSFCAG00000002921	Up	Up	None	None	Up	Up	Up	Up
ENSFCAG00000002925	None	None	None	None	Down	Down	None	Down
ENSFCAG00000002928	None	None	None	None	None	None	None	None
ENSFCAG00000002930	None	None	None	None	Up	Up	Up	Up
ENSFCAG00000002931	None	None	None	None	None	None	None	None
ENSFCAG00000002935	None	None	None	None	None	None	None	None
ENSFCAG00000002936	None	None	None	None	None	None	Up	None
ENSFCAG00000002941	None	None	None	None	Down	Down	None	Down
ENSFCAG00000002943	None	None	Up	None	None	None	None	None
ENSFCAG00000002945	None	None	None	None	Down	None	Down	Down
ENSFCAG00000002946	Down	Down	Down	Down	Down	Down	Down	Down
ENSFCAG00000002950	None	None	None	None	None	None	Down	None
ENSFCAG00000002951	None	None	None	None	Up	Up	None	Up
ENSFCAG00000002958	None	None	None	None	None	None	Down	Down
ENSFCAG00000002959	None	None	None	None	None	None	Down	None
ENSFCAG00000002960	Up	None	None	None	Up	Up	Up	Up
ENSFCAG00000002961	Up	Up	Up	Up	Up	Up	Up	Up
ENSFCAG00000002962	None	None	None	Down	None	None	None	None
ENSFCAG00000002965	Down	None	Down	None	None	None	Down	None
ENSFCAG00000002973	None	None	None	None	None	None	None	None
ENSFCAG00000002975	None	None	None	None	None	None	None	None
ENSFCAG00000002976	None	None	None	None	None	None	Down	None
ENSFCAG00000002977	Down	None	Down	Down	Down	Down	Down	Down
ENSFCAG00000002978	None	None	None	None	None	None	Down	None
ENSFCAG00000002981	None	None	Down	None	None	None	None	None
ENSFCAG00000002982	None	None	None	None	None	None	None	Down
ENSFCAG00000002986	Up	Up	Up	Up	None	None	None	Up
ENSFCAG00000002987	None	None	None	None	Up	Up	Up	Up
ENSFCAG00000002993	None	None	Up	None	None	None	None	None
ENSFCAG00000002995	None	None	Up	None	Up	Up	None	Up
ENSFCAG00000002997	None	None	None	None	None	Up	Up	Up
ENSFCAG00000002998	None	None	None	None	None	None	Up	None
ENSFCAG00000003009	None	None	None	None	None	None	None	None
ENSFCAG00000003011	None	None	None	None	None	None	Down	None
ENSFCAG00000003021	Down	Down	None	Down	None	None	None	None
ENSFCAG00000003026	None	None	None	None	None	None	Down	None
ENSFCAG00000003030	None	None	Up	None	None	None	Up	None
ENSFCAG00000003034	Up	Up	Up	Up	None	None	None	None
ENSFCAG00000003035	Up	Up	Up	Up	Up	Up	Up	Up
ENSFCAG00000003037	None	None	None	None	None	None	Down	None
ENSFCAG00000003038	None	None	None	None	Up	Up	None	Up
ENSFCAG00000003046	Down	None	Down	None	Down	Down	None	Down
ENSFCAG00000003047	Down	Down	Down	Down	Down	Down	Down	Down
ENSFCAG00000003049	Up	Up	Up	Up	Up	Up	Up	Up
ENSFCAG00000003050	Down	Down	Down	Down	Down	Down	Down	Down
ENSFCAG00000003051	Up	Up	Up	Up	Up	Up	Up	Up
ENSFCAG00000003052	Up	Up	Up	Up	Up	Up	Up	Up
ENSFCAG00000003056	Up	Up	Up	Up	None	None	None	None
ENSFCAG00000003061	Up	Up	Up	Up	Up	Up	Up	Up
ENSFCAG00000003064	None	None	None	None	None	None	None	None
ENSFCAG00000003066	None	None	None	None	None	None	Down	None
ENSFCAG00000003068	Up	Up	Up	None	Up	Up	None	Up
ENSFCAG00000003074	None	None	None	None	Up	Up	None	Up
ENSFCAG00000003075	Up	Up	Up	Up	Up	Up	Up	Up
ENSFCAG00000003080	Up	Up	Up	Up	Up	Up	Up	Up
ENSFCAG00000003086	Up	Up	Up	Up	None	None	Up	None
ENSFCAG00000003091	None	None	None	Down	None	None	None	None
ENSFCAG00000003093	None	None	Up	None	Up	Up	Up	Up
ENSFCAG00000003095	None	None	None	None	None	None	Up	None
ENSFCAG00000003098	None	None	None	None	Up	None	None	Up
ENSFCAG00000003103	None	None	None	None	None	None	Down	None
ENSFCAG00000003112	None	Up	Up	None	Down	Down	Down	Down
ENSFCAG00000003115	Down	Down	Down	Down	Down	Down	Down	Down
ENSFCAG00000003118	None	None	None	None	None	None	Down	None
ENSFCAG00000003122	None	None	None	None	Down	Down	Down	Down
ENSFCAG00000003129	None	None	None	None	None	None	Down	None
ENSFCAG00000003134	None	None	None	None	Down	Down	Down	Down
ENSFCAG00000003135	Up	Up	Up	None	Up	Up	Up	Up
ENSFCAG00000003140	Down	Down	Down	Down	Down	Down	Down	Down
ENSFCAG00000003146	None	None	Down	None	Down	Down	Down	Down
ENSFCAG00000003150	Up	Up	Up	Up	Up	Up	Up	Up
ENSFCAG00000003151	None	Up	Up	Up	None	None	None	None
ENSFCAG00000003154	Down	Down	Down	Down	None	None	Down	Down
ENSFCAG00000003156	None	None	None	None	Down	Down	None	Down
ENSFCAG00000003158	None	None	Up	None	Up	Up	Up	Up
ENSFCAG00000003159	None	None	None	Down	None	None	None	None
ENSFCAG00000003161	None	None	Up	None	Up	Up	Up	Up
ENSFCAG00000003164	Up	Up	Up	Up	None	None	None	None
ENSFCAG00000003169	Down	Down	Down	None	Down	Down	Down	Down
ENSFCAG00000003175	None	None	Down	None	Up	Up	Up	Up
ENSFCAG00000003177	None	None	None	None	Up	Up	Up	Up
ENSFCAG00000003182	Down	None	Down	None	None	Down	None	None
ENSFCAG00000003183	None	None	None	None	Down	Down	Down	Down
ENSFCAG00000003184	None	Up	None	None	Up	Up	Up	Up
ENSFCAG00000003185	Up	Up	Up	Up	Up	Up	Up	Up
ENSFCAG00000003186	None	None	None	None	None	None	Up	None
ENSFCAG00000003187	None	None	None	None	None	None	Down	None
ENSFCAG00000003188	None	None	Up	None	None	None	Up	Up
ENSFCAG00000003189	Up	Up	Up	Up	Up	Up	Up	Up
ENSFCAG00000003190	Up	None	Up	None	Up	Up	Up	Up
ENSFCAG00000003196	Down	Down	Down	Down	Down	Down	Down	Down
ENSFCAG00000003199	Up	Up	Up	Up	None	Up	None	Up
ENSFCAG00000003202	Down	Down	Down	Down	None	None	Down	None
ENSFCAG00000003204	None	None	None	None	Up	Up	Up	Up
ENSFCAG00000003208	None	None	None	None	Down	Down	Down	Down
ENSFCAG00000003209	None	None	None	None	Down	Down	Down	Down
ENSFCAG00000003211	None	None	None	None	Down	None	None	None
ENSFCAG00000003212	None	None	None	None	Up	Up	Up	Up
ENSFCAG00000003220	Up	Up	Up	Up	Up	Up	Up	Up
ENSFCAG00000003224	Down	Down	None	Down	Down	Down	None	Down
ENSFCAG00000003227	None	None	Down	None	None	None	None	None
ENSFCAG00000003230	None	None	None	None	None	Up	Up	None
ENSFCAG00000003231	None	None	None	None	None	None	Up	None
ENSFCAG00000003232	None	None	None	None	None	None	None	None
ENSFCAG00000003233	None	None	None	None	Down	None	None	None
ENSFCAG00000003237	None	None	None	None	Down	Down	Down	Down
ENSFCAG00000003238	Up	Up	Up	None	Up	None	None	Up
ENSFCAG00000003239	None	None	None	None	None	None	Up	None
ENSFCAG00000003244	Up	Up	Up	Up	Up	Up	Up	Up
ENSFCAG00000003245	None	None	None	None	Up	Up	Up	Up
ENSFCAG00000003248	None	None	None	None	None	None	None	None
ENSFCAG00000003255	None	None	None	None	None	None	Up	None
ENSFCAG00000003256	None	None	None	None	None	None	None	None
ENSFCAG00000003265	Up	Up	Up	Up	Up	Up	Up	Up
ENSFCAG00000003266	None	None	None	Down	None	None	None	None
ENSFCAG00000003271	None	None	None	None	None	None	None	None
ENSFCAG00000003282	Up	Up	Up	None	None	None	None	None
ENSFCAG00000003287	None	Down	None	Down	None	None	None	None
ENSFCAG00000003291	None	None	None	None	None	None	Down	None
ENSFCAG00000003293	Up	Up	Up	Up	Up	Up	None	Up
ENSFCAG00000003298	None	None	None	None	Down	Down	None	Down
ENSFCAG00000003299	None	None	None	None	None	None	None	None
ENSFCAG00000003303	None	Down	None	None	None	Down	None	Down
ENSFCAG00000003305	None	None	Down	None	Down	Down	Down	Down
ENSFCAG00000003306	Down	Down	Down	Down	None	None	None	None
ENSFCAG00000003311	Down	Down	None	Down	Down	Down	Down	Down
ENSFCAG00000003315	None	None	None	None	Up	Up	Up	Up
ENSFCAG00000003319	Down	None	Down	None	None	None	None	None
ENSFCAG00000003321	None	None	Down	None	Down	Down	None	Down
ENSFCAG00000003323	Up	Up	Up	Up	Up	Up	Up	Up
ENSFCAG00000003325	Down	Down	Down	Down	None	None	None	None
ENSFCAG00000003326	None	None	None	None	None	None	None	None
ENSFCAG00000003328	Up	Up	Up	Up	None	None	None	None
ENSFCAG00000003329	Up	Up	Up	Up	Up	Up	Up	Up
ENSFCAG00000003334	None	None	Up	None	Up	Up	Up	Up
ENSFCAG00000003337	Down	Down	Down	Down	Down	Down	Down	Down
ENSFCAG00000003342	None	None	None	None	None	None	Up	None
ENSFCAG00000003348	Up	None	Up	Up	Up	Up	Up	Up
ENSFCAG00000003353	Down	None	None	Down	Up	Up	Up	Up
ENSFCAG00000003354	Up	Up	Up	Up	None	None	None	None
ENSFCAG00000003360	Down	Down	None	None	None	None	None	None
ENSFCAG00000003363	None	Up	Up	Up	Up	Up	Up	Up
ENSFCAG00000003367	None	None	None	None	None	None	None	None
ENSFCAG00000003374	None	None	None	None	Up	Up	None	Up
ENSFCAG00000003376	None	None	None	None	Down	Down	Down	Down
ENSFCAG00000003377	None	None	Up	None	Up	Up	Up	Up
ENSFCAG00000003382	None	None	None	None	Up	Up	Up	Up
ENSFCAG00000003384	None	None	None	None	Up	Up	Up	Up
ENSFCAG00000003386	None	None	None	None	Down	Down	Down	Down
ENSFCAG00000003391	None	None	None	None	None	None	Up	None
ENSFCAG00000003394	Up	Up	Up	Up	None	None	None	None
ENSFCAG00000003395	None	None	Up	None	None	None	Up	None
ENSFCAG00000003404	Up	Up	Up	Up	None	None	None	None
ENSFCAG00000003408	Up	None	None	None	None	None	None	None
ENSFCAG00000003414	None	None	None	None	Up	Up	Up	Up
ENSFCAG00000003416	None	None	None	None	Down	Down	Down	Down
ENSFCAG00000003424	Up	Up	Up	Up	Up	Up	Up	Up
ENSFCAG00000003433	Up	Up	Up	Up	Up	Up	Up	Up
ENSFCAG00000003443	Up	Up	Up	Up	Up	Up	Up	Up
ENSFCAG00000003444	None	None	None	None	Down	Down	None	Down
ENSFCAG00000003445	Down	Down	Down	Down	Down	Down	Down	Down
ENSFCAG00000003448	None	Up	None	Up	None	None	None	None
ENSFCAG00000003450	Down	Down	Down	Down	Down	Down	Down	Down
ENSFCAG00000003454	None	None	Up	None	Up	Up	Up	Up
ENSFCAG00000003468	None	None	None	None	Up	Up	Up	Up
ENSFCAG00000003470	None	None	None	None	None	None	Down	None
ENSFCAG00000003474	None	None	None	None	Down	Down	Down	Down
ENSFCAG00000003482	None	None	None	None	Down	Down	None	Down
ENSFCAG00000003491	None	None	None	None	None	None	None	None
ENSFCAG00000003492	None	None	None	None	Down	Down	Down	Down
ENSFCAG00000003493	None	None	None	None	None	None	Up	None
ENSFCAG00000003494	None	None	None	None	Up	None	Up	Up
ENSFCAG00000003496	None	None	None	None	None	None	Up	None
ENSFCAG00000003501	None	None	None	None	None	None	None	None
ENSFCAG00000003502	None	None	None	None	None	None	Up	None
ENSFCAG00000003505	Up	Up	None	None	Up	Up	Up	Up
ENSFCAG00000003507	None	None	None	None	Up	Up	Up	Up
ENSFCAG00000003508	Up	Up	Up	Up	Up	Up	Up	Up
ENSFCAG00000003509	Down	Down	Down	Down	Up	Up	Up	Up
ENSFCAG00000003510	Down	None	None	None	Up	Up	Up	Up
ENSFCAG00000003513	None	None	None	Up	None	None	Up	None
ENSFCAG00000003517	None	None	None	None	Up	Up	Up	Up
ENSFCAG00000003520	Up	Up	None	Up	None	None	None	None
ENSFCAG00000003522	None	None	None	None	Up	Up	Up	Up
ENSFCAG00000003525	None	None	None	None	Down	Down	Down	Down
ENSFCAG00000003529	Up	Up	Up	Up	Up	Up	Up	Up
ENSFCAG00000003535	None	None	None	None	None	None	Down	None
ENSFCAG00000003537	None	None	None	None	Down	Down	None	None
ENSFCAG00000003541	None	None	None	None	None	None	Up	None
ENSFCAG00000003551	None	None	None	None	None	None	Up	None
ENSFCAG00000003562	None	None	None	None	Down	Down	Down	Down
ENSFCAG00000003566	None	None	None	None	None	None	None	None
ENSFCAG00000003567	None	None	Up	None	None	None	None	None
ENSFCAG00000003568	None	None	None	None	None	None	None	None
ENSFCAG00000003569	Up	Up	Up	None	Up	Up	Up	Up
ENSFCAG00000003574	None	None	None	None	None	None	None	None
ENSFCAG00000003575	Down	Down	Down	Down	Down	Down	Down	Down
ENSFCAG00000003581	Up	Up	Up	Up	Up	Up	Up	Up
ENSFCAG00000003585	None	None	None	None	Up	Up	None	Up
ENSFCAG00000003589	None	None	None	None	None	None	None	None
ENSFCAG00000003590	None	None	None	None	Up	Up	None	Up
ENSFCAG00000003598	None	None	None	None	None	None	None	None
ENSFCAG00000003602	None	Up	None	None	Up	Up	Up	Up
ENSFCAG00000003603	Up	Up	Up	Up	Up	Up	Up	Up
ENSFCAG00000003607	Up	Up	Up	Up	Up	Up	Up	Up
ENSFCAG00000003611	None	None	None	None	None	None	Down	None
ENSFCAG00000003613	None	None	None	None	None	None	None	None
ENSFCAG00000003615	Down	None	Down	Down	None	Up	None	Up
ENSFCAG00000003616	Up	Up	Up	Up	Up	Up	Up	Up
ENSFCAG00000003619	None	None	Down	None	None	None	None	None
ENSFCAG00000003621	None	None	None	Down	None	None	None	None
ENSFCAG00000003622	Up	Up	Up	Up	Up	Up	None	Up
ENSFCAG00000003623	Up	Up	Up	Up	Up	Up	Up	Up
ENSFCAG00000003625	None	None	None	None	None	None	None	None
ENSFCAG00000003628	None	Up	Up	None	Up	None	Up	None
ENSFCAG00000003629	None	None	None	None	None	None	None	None
ENSFCAG00000003633	Down	None	None	None	Up	Up	Up	Up
ENSFCAG00000003634	Down	Down	Down	None	Up	Up	Up	Up
ENSFCAG00000003635	None	None	None	Down	Up	Up	None	None
ENSFCAG00000003636	None	None	None	None	Down	Down	Down	Down
ENSFCAG00000003637	Up	Up	Up	Up	None	None	None	None
ENSFCAG00000003642	Down	Down	None	None	None	None	None	None
ENSFCAG00000003645	None	None	None	None	Down	None	None	Down
ENSFCAG00000003647	None	None	None	None	Down	Down	Down	Down
ENSFCAG00000003648	Down	Down	Down	Down	None	None	Down	None
ENSFCAG00000003651	Down	Down	None	Down	Down	None	Down	Down
ENSFCAG00000003656	None	None	None	None	None	None	Down	None
ENSFCAG00000003659	Down	Down	Down	Down	Down	None	Down	Down
ENSFCAG00000003667	Up	None	Up	Up	Up	Up	Up	Up
ENSFCAG00000003668	None	None	None	None	Down	Down	Down	Down
ENSFCAG00000003670	Down	Down	Down	Down	Down	Down	Down	Down
ENSFCAG00000003673	Down	Down	Down	Down	Down	Down	Down	Down
ENSFCAG00000003676	None	None	None	None	None	None	Down	None
ENSFCAG00000003690	Down	Down	Down	Down	None	None	None	None
ENSFCAG00000003692	None	None	None	None	Down	Down	None	Down
ENSFCAG00000003694	None	None	None	None	None	None	None	None
ENSFCAG00000003695	None	Up	Up	None	Up	Up	Up	Up
ENSFCAG00000003700	None	None	None	None	None	None	None	None
ENSFCAG00000003701	None	None	None	None	None	None	None	None
ENSFCAG00000003706	None	None	None	None	Down	Down	Down	Down
ENSFCAG00000003710	None	None	None	None	None	None	None	None
ENSFCAG00000003711	None	None	None	None	None	None	None	Up
ENSFCAG00000003712	Up	Up	None	Up	Up	Up	Up	Up
ENSFCAG00000003715	None	None	None	None	Up	Up	None	Up
ENSFCAG00000003718	None	None	None	None	None	Down	None	Down
ENSFCAG00000003720	None	None	Down	Down	Up	None	Down	None
ENSFCAG00000003721	Down	None	None	None	None	Down	Down	None
ENSFCAG00000003727	None	None	None	None	Up	Up	Up	Up
ENSFCAG00000003730	Up	None	Up	None	None	None	Up	None
ENSFCAG00000003741	None	None	None	None	None	None	Up	None
ENSFCAG00000003742	Up	Up	Up	None	Up	Up	Up	Up
ENSFCAG00000003747	Down	Down	Down	Down	Down	Down	Down	Down
ENSFCAG00000003754	None	None	Down	None	None	None	Down	None
ENSFCAG00000003755	None	None	None	None	None	Down	None	None
ENSFCAG00000003756	None	None	None	None	None	None	Down	None
ENSFCAG00000003758	Down	Down	None	Down	None	None	None	None
ENSFCAG00000003764	Down	Down	Down	Down	None	None	None	None
ENSFCAG00000003766	None	None	None	None	None	None	None	None
ENSFCAG00000003767	None	None	None	None	None	None	Up	None
ENSFCAG00000003768	None	None	None	None	Down	Down	None	Down
ENSFCAG00000003775	None	None	None	None	Down	Down	None	Down
ENSFCAG00000003777	Down	Down	Down	Down	None	None	None	None
ENSFCAG00000003778	None	None	None	None	Up	Up	Up	Up
ENSFCAG00000003779	None	None	Up	None	Up	Up	Up	Up
ENSFCAG00000003780	None	None	None	None	Up	Up	None	Up
ENSFCAG00000003782	Up	Up	Up	Up	Up	Up	Up	Up
ENSFCAG00000003783	None	None	None	None	Up	Up	Up	Up
ENSFCAG00000003787	None	None	None	None	Down	Down	None	Down
ENSFCAG00000003788	None	None	None	None	Up	None	None	None
ENSFCAG00000003792	Up	None	Up	None	Up	Up	Up	Up
ENSFCAG00000003795	None	None	None	None	Down	Down	None	Down
ENSFCAG00000003796	None	None	None	None	None	None	Up	None
ENSFCAG00000003797	Down	Down	Down	Down	Down	Down	Down	Down
ENSFCAG00000003798	None	None	None	None	None	None	Down	None
ENSFCAG00000003799	None	None	None	None	Down	Down	Down	Down
ENSFCAG00000003801	Up	Up	Up	Up	Down	Down	Down	Down
ENSFCAG00000003806	None	None	None	None	Up	Up	Up	Up
ENSFCAG00000003813	None	None	None	None	None	None	None	Down
ENSFCAG00000003815	None	None	Down	None	Down	Down	Down	Down
ENSFCAG00000003819	Up	Up	Up	Up	Up	Up	Up	Up
ENSFCAG00000003820	Down	Down	Down	Down	None	None	None	None
ENSFCAG00000003821	Up	Up	Up	Up	Up	Up	Up	Up
ENSFCAG00000003822	Up	Up	Up	Up	None	None	None	None
ENSFCAG00000003823	None	None	None	None	None	None	Down	None
ENSFCAG00000003825	Down	Down	Down	Down	Down	Down	Down	Down
ENSFCAG00000003831	Down	Down	Down	Down	None	None	None	None
ENSFCAG00000003837	Up	None	None	None	Up	Up	Up	Up
ENSFCAG00000003838	None	None	Down	None	None	None	Down	None
ENSFCAG00000003840	Up	Up	Up	None	Up	Up	Up	Up
ENSFCAG00000003841	Up	Up	None	Up	Up	Up	Up	Up
ENSFCAG00000003845	Down	Down	Down	Down	Down	Down	Down	Down
ENSFCAG00000003846	Up	Up	Up	Up	Up	Up	Up	Up
ENSFCAG00000003849	Up	Up	Up	Up	None	None	None	None
ENSFCAG00000003854	Down	Down	Down	Down	Down	Down	Down	Down
ENSFCAG00000003875	Down	Down	Down	Down	Down	Down	Down	Down
ENSFCAG00000003876	None	None	None	None	None	None	Down	Down
ENSFCAG00000003878	Up	Up	Up	Up	Up	Up	Up	Up
ENSFCAG00000003879	None	None	None	None	Up	Up	Up	Up
ENSFCAG00000003880	None	None	None	None	None	None	Down	None
ENSFCAG00000003881	None	None	None	None	Up	Up	Up	Up
ENSFCAG00000003893	Down	Down	None	Down	None	None	None	None
ENSFCAG00000003895	None	None	None	None	Up	Up	Up	Up
ENSFCAG00000003900	None	None	None	None	None	None	Up	None
ENSFCAG00000003901	None	None	None	None	None	None	None	None
ENSFCAG00000003903	None	None	None	None	Down	Down	Down	Down
ENSFCAG00000003908	None	None	None	None	Down	None	Down	Down
ENSFCAG00000003917	None	None	None	None	None	None	Up	None
ENSFCAG00000003920	Down	Down	Down	Down	Down	Down	Down	Down
ENSFCAG00000003921	Down	Down	Down	Down	Down	Down	Down	Down
ENSFCAG00000003923	None	Down	None	Down	None	None	Down	None
ENSFCAG00000003924	None	None	None	None	Down	Down	None	Down
ENSFCAG00000003925	None	None	None	None	None	None	Down	None
ENSFCAG00000003928	None	Down	None	Down	None	None	None	None
ENSFCAG00000003929	None	None	None	None	None	None	None	None
ENSFCAG00000003937	Down	Down	Down	Down	None	None	None	None
ENSFCAG00000003939	Down	Down	Down	Down	Up	Up	Up	Up
ENSFCAG00000003941	Up	Up	Up	Up	Up	Up	Up	Up
ENSFCAG00000003942	None	None	None	None	Down	Down	Down	Down
ENSFCAG00000003944	None	None	None	None	Up	Up	Up	Up
ENSFCAG00000003947	Down	Down	Down	Down	Up	None	None	None
ENSFCAG00000003956	None	None	Down	Down	Down	Down	Down	Down
ENSFCAG00000003957	None	None	Up	None	None	None	None	None
ENSFCAG00000003958	Down	Down	Down	Down	None	None	None	None
ENSFCAG00000003960	None	None	None	Down	None	None	None	None
ENSFCAG00000003962	None	None	None	Down	None	None	None	None
ENSFCAG00000003965	None	None	None	None	Up	None	None	None
ENSFCAG00000003966	None	Down	Down	Down	Down	Down	Down	Down
ENSFCAG00000003969	Up	None	Up	None	None	None	None	None
ENSFCAG00000003970	None	None	None	None	Down	Down	Down	Down
ENSFCAG00000003971	None	None	None	None	None	None	None	None
ENSFCAG00000003976	None	None	None	Up	Up	Up	Up	Up
ENSFCAG00000003977	None	None	None	None	None	None	Up	Up
ENSFCAG00000003978	None	None	None	None	None	None	None	None
ENSFCAG00000003983	Down	Down	Down	Down	Down	Down	None	Down
ENSFCAG00000003984	Up	None	Up	None	Up	None	None	None
ENSFCAG00000003989	Up	Up	None	Up	Down	Down	None	Down
ENSFCAG00000003996	Down	Down	Down	Down	Down	Down	Down	Down
ENSFCAG00000003997	None	None	None	None	Down	Down	Down	Down
ENSFCAG00000004005	Up	Up	Up	Up	Up	Up	Up	Up
ENSFCAG00000004006	Down	None	Down	None	Down	None	None	None
ENSFCAG00000004007	Up	Up	Up	Up	None	None	Up	None
ENSFCAG00000004008	None	Down	None	Down	None	None	None	None
ENSFCAG00000004011	None	None	None	None	None	None	Down	None
ENSFCAG00000004015	Down	Down	Down	Down	Down	Down	Down	Down
ENSFCAG00000004022	None	None	None	None	Up	None	None	None
ENSFCAG00000004023	Down	Down	Down	Down	Down	Down	Down	Down
ENSFCAG00000004024	None	None	None	None	None	None	None	None
ENSFCAG00000004027	Down	None	None	None	Down	Down	Down	Down
ENSFCAG00000004028	None	None	None	None	Down	None	Down	None
ENSFCAG00000004030	None	None	None	None	Down	None	None	Down
ENSFCAG00000004031	None	Up	None	None	None	None	None	None
ENSFCAG00000004032	Up	Up	Up	Up	Up	Up	Up	Up
ENSFCAG00000004033	None	None	None	None	None	None	None	Down
ENSFCAG00000004034	Up	Up	Up	None	None	None	None	None
ENSFCAG00000004039	None	None	Up	None	Up	None	None	Up
ENSFCAG00000004043	None	None	None	None	None	None	Up	Up
ENSFCAG00000004046	Up	None	Up	None	Up	Up	Up	Up
ENSFCAG00000004047	None	None	None	None	None	None	None	None
ENSFCAG00000004055	None	None	None	None	None	None	Up	None
ENSFCAG00000004068	Down	Down	Down	Down	Down	Down	Down	Down
ENSFCAG00000004069	None	None	None	None	None	None	None	None
ENSFCAG00000004072	None	None	None	Up	None	None	None	None
ENSFCAG00000004073	None	None	None	Up	None	None	None	None
ENSFCAG00000004074	Up	Up	Up	Up	None	Up	Up	None
ENSFCAG00000004075	Down	None	None	None	None	None	None	None
ENSFCAG00000004077	Up	Up	Up	Up	Down	Down	Down	Down
ENSFCAG00000004079	Up	Up	Up	Up	Up	Up	Up	Up
ENSFCAG00000004082	None	None	None	None	None	None	Down	None
ENSFCAG00000004084	Up	None	Up	None	Up	Up	Up	Up
ENSFCAG00000004089	None	None	None	None	Down	Down	Down	Down
ENSFCAG00000004090	None	None	Down	None	Down	Down	Down	Down
ENSFCAG00000004091	None	None	None	None	Down	Down	None	Down
ENSFCAG00000004096	None	None	Down	None	None	None	None	None
ENSFCAG00000004097	None	None	None	None	Up	Up	None	Up
ENSFCAG00000004099	Up	Up	Up	Up	Up	Up	Up	Up
ENSFCAG00000004101	None	None	None	None	None	None	Up	None
ENSFCAG00000004105	Up	Up	Up	Up	Up	Up	Up	Up
ENSFCAG00000004111	Down	Down	Down	Down	Down	Down	Down	Down
ENSFCAG00000004112	None	None	None	Down	None	None	None	None
ENSFCAG00000004113	Down	Down	Down	None	Down	Down	Down	Down
ENSFCAG00000004115	None	None	None	None	Down	Down	Down	Down
ENSFCAG00000004117	None	None	None	None	Up	Up	Up	Up
ENSFCAG00000004125	Up	Up	Up	Up	None	None	Up	None
ENSFCAG00000004134	None	None	Down	None	Down	Down	Down	Down
ENSFCAG00000004135	None	None	None	Up	None	None	None	None
ENSFCAG00000004136	Down	None	None	Down	Down	Down	Down	Down
ENSFCAG00000004139	Down	Down	Down	Down	Down	Down	Down	Down
ENSFCAG00000004140	None	None	None	None	Up	None	None	Up
ENSFCAG00000004152	Up	Up	Up	Up	Up	Up	Up	Up
ENSFCAG00000004155	None	None	None	None	Up	None	None	Up
ENSFCAG00000004159	None	None	Up	None	None	Up	Down	None
ENSFCAG00000004160	None	None	None	None	Up	Up	Up	Up
ENSFCAG00000004169	None	None	None	None	Down	Down	None	Down
ENSFCAG00000004171	Down	Down	Down	None	Down	Down	Down	Down
ENSFCAG00000004177	Up	Up	Up	Up	Up	Up	Up	Up
ENSFCAG00000004182	None	None	None	None	None	None	Up	None
ENSFCAG00000004186	Down	None	None	Down	Down	Down	Down	Down
ENSFCAG00000004196	Up	Up	Up	Up	Up	Up	Up	Up
ENSFCAG00000004198	Up	Up	Up	Up	None	None	None	None
ENSFCAG00000004199	Up	None	Up	None	Up	Up	Up	Up
ENSFCAG00000004201	Up	Up	Up	Up	Up	Up	Up	Up
ENSFCAG00000004210	None	None	None	None	None	None	None	Up
ENSFCAG00000004212	Up	None	Up	None	Up	Up	Up	Up
ENSFCAG00000004214	Up	None	None	None	None	None	None	None
ENSFCAG00000004215	Up	Up	Up	None	Down	Down	None	Down
ENSFCAG00000004218	None	None	None	None	Down	Down	Down	Down
ENSFCAG00000004219	Up	Up	Up	None	Up	Up	Up	Up
ENSFCAG00000004223	None	Up	Up	Up	None	None	Up	None
ENSFCAG00000004225	Up	None	Up	None	Up	Up	Up	Up
ENSFCAG00000004226	Down	None	Down	Down	Down	None	None	Down
ENSFCAG00000004231	Down	Down	Down	Down	Down	Down	Down	Down
ENSFCAG00000004234	Up	Up	None	None	None	None	None	Up
ENSFCAG00000004237	Up	Up	Up	Up	Up	Up	None	Up
ENSFCAG00000004238	None	None	None	None	None	None	None	None
ENSFCAG00000004239	Up	Up	Up	Up	Up	Up	Up	Up
ENSFCAG00000004240	Up	Up	Up	Up	Up	Up	Up	Up
ENSFCAG00000004241	Up	None	None	None	Up	Up	Up	Up
ENSFCAG00000004242	None	None	None	Down	None	None	Down	None
ENSFCAG00000004243	Down	Down	Down	Down	Down	Down	Down	Down
ENSFCAG00000004244	Down	None	None	None	Up	Up	Up	Up
ENSFCAG00000004245	Up	Up	Up	Up	None	None	None	Up
ENSFCAG00000004246	Up	Up	Up	Up	Up	Up	Up	Up
ENSFCAG00000004248	None	None	None	None	None	None	None	None
ENSFCAG00000004250	Up	None	Up	None	Up	Up	Up	Up
ENSFCAG00000004253	Up	Up	Up	Up	Up	Up	None	Up
ENSFCAG00000004254	Up	Up	Up	Up	Up	Up	Up	Up
ENSFCAG00000004258	Up	Up	Up	Up	Up	Up	Up	Up
ENSFCAG00000004260	None	None	None	None	None	None	Down	None
ENSFCAG00000004261	Up	Up	Up	Up	None	Down	Down	None
ENSFCAG00000004262	Up	Up	Up	Up	None	None	None	None
ENSFCAG00000004265	None	None	Up	None	Up	Up	Up	Up
ENSFCAG00000004266	Up	Up	Up	Up	None	Up	Up	Up
ENSFCAG00000004267	Up	Up	Up	Up	None	None	Up	None
ENSFCAG00000004268	None	None	None	None	Down	Down	Down	Down
ENSFCAG00000004270	Down	Down	Down	Down	Up	Up	Up	Up
ENSFCAG00000004274	None	None	None	None	Down	Down	Down	Down
ENSFCAG00000004276	Down	None	Down	None	Down	Down	Down	Down
ENSFCAG00000004277	Up	Up	Up	Up	Up	Up	Up	None
ENSFCAG00000004278	None	None	None	None	Up	Up	Up	Up
ENSFCAG00000004280	None	None	None	Up	Up	Up	Up	Up
ENSFCAG00000004281	Down	Down	Down	Down	Down	Down	Down	Down
ENSFCAG00000004282	None	None	None	None	Up	Up	Up	Up
ENSFCAG00000004285	Down	None	Down	None	Down	Down	Down	Down
ENSFCAG00000004288	Down	Down	Down	Down	Down	Down	Down	Down
ENSFCAG00000004290	None	None	None	None	Up	None	None	None
ENSFCAG00000004295	Up	Up	Up	Up	None	None	None	None
ENSFCAG00000004297	None	None	None	None	Down	Down	Down	Down
ENSFCAG00000004299	Up	Up	Up	Up	Up	Up	Up	Up
ENSFCAG00000004302	None	None	None	None	None	None	None	None
ENSFCAG00000004303	None	None	None	None	Up	None	Up	Up
ENSFCAG00000004305	Down	Down	Down	Down	Down	Down	None	Down
ENSFCAG00000004308	Down	None	Down	None	None	None	None	None
ENSFCAG00000004311	None	None	None	None	None	None	None	None
ENSFCAG00000004317	Up	Up	Up	Up	None	None	Down	None
ENSFCAG00000004322	None	Down	None	None	Down	Down	Down	Down
ENSFCAG00000004324	None	None	None	None	Up	Up	Up	Up
ENSFCAG00000004325	None	None	None	Up	None	Up	None	None
ENSFCAG00000004331	None	None	None	None	None	None	None	None
ENSFCAG00000004332	None	None	Up	None	None	None	None	None
ENSFCAG00000004336	None	None	None	None	None	None	Down	Down
ENSFCAG00000004339	None	None	None	None	None	None	None	None
ENSFCAG00000004345	None	None	None	None	None	None	None	None
ENSFCAG00000004348	Up	Up	Up	Up	Up	Up	Up	Up
ENSFCAG00000004351	None	None	None	None	Up	Up	Up	Up
ENSFCAG00000004355	None	None	Down	None	Down	Down	Down	Down
ENSFCAG00000004357	Up	Up	Up	Up	None	None	None	None
ENSFCAG00000004375	None	None	None	None	Up	Up	Up	Up
ENSFCAG00000004384	Down	Down	Down	None	None	None	Down	None
ENSFCAG00000004394	None	None	Up	None	None	None	Up	None
ENSFCAG00000004397	Up	Up	Up	None	Up	Up	Up	Up
ENSFCAG00000004400	None	None	None	None	None	None	Up	None
ENSFCAG00000004403	None	None	None	None	Up	Up	Up	Up
ENSFCAG00000004406	None	None	None	None	Up	None	Up	Up
ENSFCAG00000004408	Down	Down	Down	Down	Down	Down	Down	Down
ENSFCAG00000004414	Up	Up	Up	Up	Up	Up	Up	Up
ENSFCAG00000004415	Up	Up	Up	Up	None	None	None	None
ENSFCAG00000004418	Up	Up	Up	Up	Up	Up	Up	Up
ENSFCAG00000004423	None	None	None	None	None	None	None	None
ENSFCAG00000004424	None	None	None	None	Up	Up	Up	Up
ENSFCAG00000004425	Up	Up	Up	Up	Up	Up	Up	Up
ENSFCAG00000004426	Up	Up	Up	None	None	None	None	Up
ENSFCAG00000004427	None	Down	Down	Down	Down	Down	Down	None
ENSFCAG00000004429	None	None	None	None	Up	None	None	Up
ENSFCAG00000004433	None	None	None	None	Down	Down	Down	Down
ENSFCAG00000004434	None	None	Up	None	None	None	Up	Up
ENSFCAG00000004435	None	None	None	None	Down	Down	None	Down
ENSFCAG00000004436	Up	None	Up	None	Up	Up	None	Up
ENSFCAG00000004437	Down	Down	Down	Down	None	None	None	None
ENSFCAG00000004439	None	None	None	None	None	None	Down	None
ENSFCAG00000004443	None	None	None	None	None	None	None	None
ENSFCAG00000004445	Up	Up	Up	None	Up	Up	Up	Up
ENSFCAG00000004451	None	None	None	None	None	None	Up	None
ENSFCAG00000004452	None	None	None	None	Up	Up	Up	Up
ENSFCAG00000004453	None	None	None	None	Down	Down	None	Down
ENSFCAG00000004459	None	None	None	None	Down	None	None	Down
ENSFCAG00000004460	Down	Down	Down	Down	None	None	None	None
ENSFCAG00000004465	None	None	None	None	None	None	Down	None
ENSFCAG00000004467	None	None	None	None	None	None	None	None
ENSFCAG00000004470	None	None	None	None	Up	Up	Up	Up
ENSFCAG00000004474	None	None	None	None	Up	None	None	None
ENSFCAG00000004478	Down	Down	Down	None	None	None	None	None
ENSFCAG00000004480	None	None	None	None	Down	Down	None	Down
ENSFCAG00000004484	None	None	None	None	Up	None	None	None
ENSFCAG00000004487	None	None	None	None	None	None	None	None
ENSFCAG00000004488	Up	Up	Up	Up	Up	Up	Up	Up
ENSFCAG00000004490	Down	None	None	Down	None	None	Down	None
ENSFCAG00000004497	None	None	Down	None	None	None	Down	None
ENSFCAG00000004509	Up	Up	Up	Up	Up	Up	Up	Up
ENSFCAG00000004510	None	None	None	None	None	None	None	None
ENSFCAG00000004524	None	None	None	None	None	Up	None	Up
ENSFCAG00000004526	None	None	None	None	Up	Up	None	Up
ENSFCAG00000004529	Down	Down	Down	Down	Down	Down	Down	Down
ENSFCAG00000004530	Down	Down	Down	Down	None	None	Down	None
ENSFCAG00000004533	Up	None	None	None	None	None	Up	Up
ENSFCAG00000004539	None	None	None	None	None	None	None	Up
ENSFCAG00000004544	None	None	None	None	Down	None	None	None
ENSFCAG00000004546	None	None	None	None	Up	Up	Up	Up
ENSFCAG00000004553	Up	Up	Up	Up	None	None	None	None
ENSFCAG00000004555	None	None	None	None	None	None	None	None
ENSFCAG00000004556	None	None	None	None	None	None	None	Up
ENSFCAG00000004557	None	None	None	None	Up	Up	Up	Up
ENSFCAG00000004558	None	None	None	None	Up	Up	None	Up
ENSFCAG00000004560	None	None	None	None	Up	Up	None	Up
ENSFCAG00000004561	None	None	None	None	None	None	None	None
ENSFCAG00000004564	Down	Down	Down	Down	Down	Down	Down	Down
ENSFCAG00000004566	None	None	None	None	None	Down	None	None
ENSFCAG00000004568	None	None	None	None	Up	Up	Up	Up
ENSFCAG00000004570	Up	None	Up	None	None	None	Up	None
ENSFCAG00000004572	Up	Up	Up	Up	Up	Up	Up	Up
ENSFCAG00000004573	Down	Down	Down	Down	None	None	None	None
ENSFCAG00000004581	Up	Up	Up	Up	None	None	Up	None
ENSFCAG00000004587	None	None	Up	None	None	None	None	None
ENSFCAG00000004591	None	Up	Up	None	None	None	None	None
ENSFCAG00000004595	None	None	None	None	None	Up	None	None
ENSFCAG00000004597	None	None	Up	None	Up	Up	Up	Up
ENSFCAG00000004605	Up	Up	Up	None	None	None	None	None
ENSFCAG00000004609	Up	Up	Up	Up	Up	None	Up	None
ENSFCAG00000004610	None	None	None	None	Up	Up	Up	Up
ENSFCAG00000004611	Up	Up	Up	Up	Up	Up	Up	Up
ENSFCAG00000004612	Down	Down	None	Down	Down	Down	Down	Down
ENSFCAG00000004613	Down	Down	Down	Down	Up	Up	Up	Up
ENSFCAG00000004626	None	None	None	None	None	None	Up	None
ENSFCAG00000004628	Down	Down	Down	Down	Down	Down	Down	Down
ENSFCAG00000004632	Up	Up	Up	Up	None	Up	Up	None
ENSFCAG00000004633	None	Down	None	None	None	None	Up	None
ENSFCAG00000004642	None	None	None	None	Up	Up	Up	Up
ENSFCAG00000004653	None	None	None	None	Down	Down	None	Down
ENSFCAG00000004659	None	None	None	None	None	None	None	None
ENSFCAG00000004660	Up	Up	Up	Up	Up	Up	Up	Up
ENSFCAG00000004661	None	None	None	Down	Up	Up	Up	Up
ENSFCAG00000004666	None	Up	None	None	None	None	Down	None
ENSFCAG00000004667	None	None	None	Down	Down	Down	Down	Down
ENSFCAG00000004671	Up	Up	Up	Up	Up	Up	Up	Up
ENSFCAG00000004673	None	None	None	None	Up	Up	Up	Up
ENSFCAG00000004679	Up	Up	Up	Up	Up	Up	Up	Up
ENSFCAG00000004680	None	None	Down	None	Down	Down	Down	Down
ENSFCAG00000004683	Up	Up	None	Up	Up	Up	Up	Up
ENSFCAG00000004684	Up	None	None	Up	None	None	None	None
ENSFCAG00000004685	None	None	None	None	Up	Up	Up	Up
ENSFCAG00000004691	None	None	None	None	Up	Up	None	Up
ENSFCAG00000004692	None	None	None	None	Up	Up	Up	Up
ENSFCAG00000004694	Up	Up	Up	None	Up	Up	Up	Up
ENSFCAG00000004695	None	None	None	None	None	Down	None	None
ENSFCAG00000004698	Up	Up	Up	Up	None	None	Up	None
ENSFCAG00000004699	Up	Up	Up	Up	None	Up	Up	Up
ENSFCAG00000004700	None	None	None	None	Up	Up	Up	Up
ENSFCAG00000004703	Up	Up	Up	Up	None	None	Up	None
ENSFCAG00000004717	Up	None	None	None	Up	Up	None	Up
ENSFCAG00000004720	None	None	None	Up	None	None	Down	None
ENSFCAG00000004723	None	None	None	None	None	None	None	None
ENSFCAG00000004726	None	None	None	None	Up	Up	Up	Up
ENSFCAG00000004727	Up	Up	Up	Up	None	None	None	None
ENSFCAG00000004729	Up	Up	Up	Up	None	None	None	None
ENSFCAG00000004731	Down	Down	Down	Down	Down	Down	Down	Down
ENSFCAG00000004735	Up	Up	Up	Up	Up	Up	Up	Up
ENSFCAG00000004736	Down	Down	Down	Down	None	Down	None	Down
ENSFCAG00000004737	None	None	None	None	None	None	None	None
ENSFCAG00000004738	Down	Down	Down	Down	Down	Down	Down	Down
ENSFCAG00000004743	None	None	None	Down	Up	Up	Up	Up
ENSFCAG00000004744	None	None	None	None	Up	Up	None	Up
ENSFCAG00000004745	None	None	None	None	Up	Up	None	Up
ENSFCAG00000004746	Up	Up	Up	Up	Up	Up	Up	Up
ENSFCAG00000004747	None	Up	Up	None	None	None	Up	None
ENSFCAG00000004749	Up	Up	Up	Up	Up	Up	Up	Up
ENSFCAG00000004756	None	None	None	None	None	None	None	None
ENSFCAG00000004758	Down	Down	Down	Down	Down	Down	Down	Down
ENSFCAG00000004759	None	None	None	None	None	None	Down	None
ENSFCAG00000004760	None	None	None	None	Down	Down	None	Down
ENSFCAG00000004763	None	None	None	None	None	None	Down	None
ENSFCAG00000004764	None	None	None	None	Down	Down	None	Down
ENSFCAG00000004767	Down	None	None	None	None	None	None	None
ENSFCAG00000004768	Up	Up	Up	None	Up	Up	None	Up
ENSFCAG00000004769	Down	Down	Down	Down	Up	Up	Up	Up
ENSFCAG00000004770	Up	Up	Up	None	None	Up	Up	None
ENSFCAG00000004771	Down	Down	Down	Down	Down	Down	Down	Down
ENSFCAG00000004772	None	None	None	None	None	None	None	Up
ENSFCAG00000004774	Up	Up	Up	Up	Up	Up	Up	Up
ENSFCAG00000004779	Down	Down	Down	Down	Down	Down	Down	Down
ENSFCAG00000004783	None	None	None	None	None	None	Up	None
ENSFCAG00000004785	None	None	None	None	Up	Up	None	Up
ENSFCAG00000004786	Up	Up	Up	None	None	None	None	None
ENSFCAG00000004793	None	None	None	None	None	None	Down	None
ENSFCAG00000004796	Down	Down	Down	Down	Down	Down	Down	Down
ENSFCAG00000004797	None	None	None	None	Up	Up	None	Up
ENSFCAG00000004798	None	None	None	None	None	None	None	None
ENSFCAG00000004800	Up	Up	Up	Up	Up	Up	Up	Up
ENSFCAG00000004803	None	None	Up	None	None	None	None	None
ENSFCAG00000004804	None	None	Up	None	None	None	Down	None
ENSFCAG00000004805	None	None	Down	Down	None	None	None	None
ENSFCAG00000004808	Up	None	None	None	Up	Up	Up	Up
ENSFCAG00000004809	Up	Up	Up	Up	Up	Up	None	None
ENSFCAG00000004810	None	None	None	None	None	None	None	None
ENSFCAG00000004817	Down	Down	Down	Down	None	None	None	None
ENSFCAG00000004819	Down	Down	Down	Down	Down	Down	Down	Down
ENSFCAG00000004825	None	None	Down	None	None	None	None	None
ENSFCAG00000004828	None	None	None	Up	None	None	None	None
ENSFCAG00000004831	None	None	None	None	None	None	None	None
ENSFCAG00000004833	Up	Up	Up	Up	Up	Up	Up	Up
ENSFCAG00000004835	None	Down	Down	Down	Down	Down	Down	Down
ENSFCAG00000004840	Down	None	None	None	Down	Down	Down	Down
ENSFCAG00000004853	None	None	None	None	None	None	Down	None
ENSFCAG00000004858	None	None	None	None	None	None	Down	None
ENSFCAG00000004862	None	None	None	None	None	None	None	None
ENSFCAG00000004867	None	None	None	None	Up	Up	Up	Up
ENSFCAG00000004874	Down	None	Down	None	None	None	None	None
ENSFCAG00000004876	None	None	None	None	None	None	Up	None
ENSFCAG00000004878	Down	None	None	None	Down	Down	Down	Down
ENSFCAG00000004880	None	None	None	Up	Up	Up	Up	Up
ENSFCAG00000004881	None	None	None	None	Up	Up	None	Up
ENSFCAG00000004882	Up	Up	Up	Up	Up	Up	Up	Up
ENSFCAG00000004883	None	None	None	None	None	None	None	None
ENSFCAG00000004884	None	None	None	None	Up	Up	None	Up
ENSFCAG00000004887	Down	None	Down	None	Down	Down	Down	Down
ENSFCAG00000004891	Down	Down	Down	None	Down	Down	Down	Down
ENSFCAG00000004892	None	None	Up	None	Up	Up	Up	Up
ENSFCAG00000004893	None	None	None	None	Down	Down	Down	Down
ENSFCAG00000004894	None	None	None	None	None	None	Down	None
ENSFCAG00000004895	Down	Down	Down	Down	Down	Down	Down	Down
ENSFCAG00000004896	Down	None	None	None	None	Down	Down	Down
ENSFCAG00000004898	None	None	None	None	None	None	None	Down
ENSFCAG00000004899	Up	None	Up	None	None	None	None	None
ENSFCAG00000004901	None	None	None	None	Up	Up	None	Up
ENSFCAG00000004906	None	None	None	None	Up	Up	None	Up
ENSFCAG00000004907	None	None	None	None	Down	Down	None	Down
ENSFCAG00000004911	None	None	None	None	Down	Down	None	None
ENSFCAG00000004912	Up	None	Up	None	Up	Up	Up	Up
ENSFCAG00000004913	Up	Up	Up	Up	Up	Up	Up	Up
ENSFCAG00000004915	Up	None	Up	None	Up	Up	None	Up
ENSFCAG00000004917	None	None	None	None	Down	None	None	None
ENSFCAG00000004919	None	None	None	None	None	None	Down	None
ENSFCAG00000004922	None	None	None	Down	None	None	None	None
ENSFCAG00000004928	None	None	None	None	None	None	None	None
ENSFCAG00000004933	None	None	None	None	Up	Up	None	Up
ENSFCAG00000004938	Down	Down	Down	Down	Down	Down	Down	Down
ENSFCAG00000004945	Up	Up	Up	Up	None	Up	None	Up
ENSFCAG00000004948	None	None	None	Down	None	None	Up	None
ENSFCAG00000004951	None	None	None	None	None	Up	None	Up
ENSFCAG00000004953	None	None	None	None	Down	Down	None	Down
ENSFCAG00000004956	None	None	None	None	Down	Down	Down	Down
ENSFCAG00000004957	None	None	None	None	Down	Down	Down	Down
ENSFCAG00000004963	None	None	None	None	Up	Up	Up	Up
ENSFCAG00000004964	None	None	None	None	None	None	None	None
ENSFCAG00000004966	Down	Down	Down	Down	Down	Down	Down	Down
ENSFCAG00000004967	Up	Up	Up	Up	Up	Up	Up	Up
ENSFCAG00000004970	None	None	None	None	None	None	Up	None
ENSFCAG00000004971	Up	Up	Up	Up	None	None	None	None
ENSFCAG00000004972	None	None	None	None	Up	Up	None	Up
ENSFCAG00000004974	None	None	None	None	Up	Up	Up	Up
ENSFCAG00000004976	None	None	None	None	None	None	Up	None
ENSFCAG00000004977	None	Up	None	Up	None	None	None	None
ENSFCAG00000004983	Up	Up	Up	Up	Up	Up	Up	Up
ENSFCAG00000004986	Up	None	Up	None	Up	Up	Up	Up
ENSFCAG00000004987	Up	None	Up	None	Up	Up	Up	Up
ENSFCAG00000004990	None	None	Down	None	None	None	None	None
ENSFCAG00000004991	None	None	None	None	Down	Down	Down	Down
ENSFCAG00000005001	None	None	None	None	Down	None	None	None
ENSFCAG00000005012	Up	Up	Up	Up	Up	Up	Up	Up
ENSFCAG00000005016	Down	None	None	Down	Down	Down	Down	Down
ENSFCAG00000005018	Down	None	Down	None	Down	Down	Down	Down
ENSFCAG00000005022	Up	Up	None	Up	Up	Up	None	Up
ENSFCAG00000005026	None	None	None	None	None	None	Up	None
ENSFCAG00000005027	Down	None	Down	None	None	None	Down	Down
ENSFCAG00000005030	Down	Down	Down	Down	None	None	None	None
ENSFCAG00000005031	None	None	None	None	Down	Down	Down	Down
ENSFCAG00000005032	None	None	None	None	None	Up	Up	Up
ENSFCAG00000005036	None	None	None	None	Up	Up	Up	Up
ENSFCAG00000005040	Up	Up	Up	Up	Up	Up	Up	Up
ENSFCAG00000005042	None	None	Up	None	Up	Up	Up	Up
ENSFCAG00000005043	Down	None	None	None	Down	None	None	None
ENSFCAG00000005044	None	None	None	None	Up	Up	Up	Up
ENSFCAG00000005053	None	None	None	None	None	None	Up	None
ENSFCAG00000005054	Up	None	Up	None	None	None	None	Up
ENSFCAG00000005059	Down	Down	Down	Down	Down	Down	Down	Down
ENSFCAG00000005060	None	None	None	None	Up	Up	None	None
ENSFCAG00000005065	Down	Down	Down	None	None	None	None	None
ENSFCAG00000005068	None	None	None	Down	Up	Up	Up	Up
ENSFCAG00000005078	None	None	None	None	None	None	None	None
ENSFCAG00000005079	Up	Up	Up	None	None	None	None	None
ENSFCAG00000005081	None	None	None	None	None	None	Up	None
ENSFCAG00000005084	None	None	None	None	None	Down	None	None
ENSFCAG00000005085	Up	Up	Up	Up	Up	Up	Up	Up
ENSFCAG00000005088	Up	Up	Up	Up	Up	Up	None	Up
ENSFCAG00000005089	Up	Up	Up	None	Up	Up	Up	Up
ENSFCAG00000005091	None	None	None	None	Up	Up	None	Up
ENSFCAG00000005094	Down	None	Down	None	Down	Down	Down	Down
ENSFCAG00000005095	None	None	None	None	None	None	None	None
ENSFCAG00000005098	Down	Down	Down	Down	Down	Down	Down	Down
ENSFCAG00000005101	None	None	None	None	Down	None	None	None
ENSFCAG00000005102	Down	None	None	None	None	None	None	None
ENSFCAG00000005103	Up	Up	Up	Up	None	None	Up	None
ENSFCAG00000005106	None	None	None	None	Down	Down	Down	Down
ENSFCAG00000005109	Down	Down	Down	Down	Down	Down	Down	Down
ENSFCAG00000005111	Up	Up	Up	None	Up	Up	None	Up
ENSFCAG00000005115	None	Down	Down	Down	Down	Down	Down	Down
ENSFCAG00000005117	None	Up	Up	None	Up	Up	None	Up
ENSFCAG00000005118	None	None	Up	None	Up	Up	None	Up
ENSFCAG00000005120	None	None	None	None	Down	Down	None	Down
ENSFCAG00000005122	None	None	None	Down	Up	None	None	None
ENSFCAG00000005127	None	None	Up	None	None	None	None	None
ENSFCAG00000005128	Down	Down	Down	Down	None	None	None	Down
ENSFCAG00000005129	None	None	None	Down	None	None	None	None
ENSFCAG00000005135	None	None	None	Down	Down	Down	Down	Down
ENSFCAG00000005137	None	None	Down	None	None	None	None	None
ENSFCAG00000005139	Up	Up	Up	Up	Up	Up	Up	Up
ENSFCAG00000005146	None	None	None	None	Down	Down	Down	Down
ENSFCAG00000005147	Up	Up	Up	Up	Up	Up	None	Up
ENSFCAG00000005150	Up	Up	Up	Up	None	None	None	None
ENSFCAG00000005151	Down	Down	Down	Down	Up	Up	None	Up
ENSFCAG00000005154	None	Down	Down	None	None	None	None	None
ENSFCAG00000005157	Down	Down	Down	Down	Down	Down	Down	Down
ENSFCAG00000005162	None	None	None	None	Up	Up	Up	None
ENSFCAG00000005165	None	Up	None	Up	Up	Up	None	Up
ENSFCAG00000005170	Up	Up	Up	Up	None	None	None	None
ENSFCAG00000005173	Up	Up	Up	Up	Up	Up	Up	Up
ENSFCAG00000005177	None	None	None	None	None	None	Up	None
ENSFCAG00000005178	Down	Down	Down	Down	Down	Down	Down	Down
ENSFCAG00000005186	None	None	None	None	Up	Up	Up	Up
ENSFCAG00000005188	Up	Up	Up	Up	Up	Up	Up	Up
ENSFCAG00000005189	None	None	None	None	None	Down	None	Down
ENSFCAG00000005190	None	None	None	None	None	None	Up	None
ENSFCAG00000005191	None	None	Up	None	None	None	None	None
ENSFCAG00000005199	None	None	None	None	None	None	Up	Up
ENSFCAG00000005203	Down	None	None	None	None	None	Down	None
ENSFCAG00000005204	None	None	None	None	None	None	Up	None
ENSFCAG00000005206	None	None	None	None	Down	Down	Down	Down
ENSFCAG00000005209	None	None	None	None	None	None	Down	None
ENSFCAG00000005211	None	None	None	None	None	None	None	None
ENSFCAG00000005213	Up	Up	Up	Up	Up	Up	Up	Up
ENSFCAG00000005215	None	None	None	None	Down	None	None	None
ENSFCAG00000005221	Up	Up	None	None	None	None	None	None
ENSFCAG00000005223	None	None	None	None	Down	Down	Down	Down
ENSFCAG00000005227	None	None	Up	None	Up	Up	Up	Up
ENSFCAG00000005229	Up	Up	Up	Up	Up	Up	Up	Up
ENSFCAG00000005230	Down	Down	Down	Down	None	None	None	None
ENSFCAG00000005236	Down	Down	Down	None	Up	Up	Up	None
ENSFCAG00000005238	Down	Down	Down	Down	Down	None	Down	Down
ENSFCAG00000005251	None	None	Down	None	None	None	Down	None
ENSFCAG00000005257	None	None	None	None	Down	Down	Down	Down
ENSFCAG00000005261	Down	Down	Down	Down	None	None	None	None
ENSFCAG00000005262	None	None	None	None	None	None	Up	None
ENSFCAG00000005265	Down	None	Down	None	Down	None	Down	Down
ENSFCAG00000005266	None	None	None	None	Down	Down	None	Down
ENSFCAG00000005268	Down	Down	Down	Down	Down	Down	Down	Down
ENSFCAG00000005271	None	None	None	Down	None	None	None	None
ENSFCAG00000005274	None	None	None	None	Down	Down	Down	Down
ENSFCAG00000005277	None	None	None	None	None	None	None	None
ENSFCAG00000005278	Down	None	Down	None	Down	Down	Down	Down
ENSFCAG00000005281	None	None	None	None	Up	Up	Up	Up
ENSFCAG00000005284	None	None	None	None	Up	Up	None	Up
ENSFCAG00000005286	Up	Up	Up	Up	Up	Up	Up	Up
ENSFCAG00000005288	Up	Up	Up	Up	Up	Up	Up	Up
ENSFCAG00000005292	None	None	None	None	None	None	Up	None
ENSFCAG00000005295	None	None	None	None	None	None	Down	None
ENSFCAG00000005296	Down	None	None	None	None	None	None	None
ENSFCAG00000005299	None	None	None	None	Down	Down	Down	Down
ENSFCAG00000005304	Down	None	Down	Down	Down	Down	Down	Down
ENSFCAG00000005305	None	None	None	None	Up	Up	Up	Up
ENSFCAG00000005306	None	None	None	None	None	None	Down	None
ENSFCAG00000005308	None	None	None	None	None	None	Down	None
ENSFCAG00000005317	None	None	None	None	Down	Down	None	Down
ENSFCAG00000005319	Up	Up	None	None	Up	Up	None	Up
ENSFCAG00000005320	None	None	None	None	None	None	Down	None
ENSFCAG00000005321	None	None	None	None	None	None	Down	None
ENSFCAG00000005323	Down	Down	Down	Down	Down	Down	Down	Down
ENSFCAG00000005329	Down	Down	Down	None	Down	Down	Down	Down
ENSFCAG00000005332	None	None	None	None	Up	None	Up	None
ENSFCAG00000005333	None	Up	None	None	None	None	None	None
ENSFCAG00000005338	None	None	None	None	None	None	Down	Down
ENSFCAG00000005340	None	None	None	None	Up	Up	None	Up
ENSFCAG00000005341	Up	Up	Up	Up	Up	Up	Up	Up
ENSFCAG00000005342	Up	Up	Up	Up	Up	Up	Up	Up
ENSFCAG00000005343	None	None	None	None	None	None	Up	None
ENSFCAG00000005351	None	None	None	None	Up	Up	Up	None
ENSFCAG00000005364	None	None	None	None	Down	Down	None	Down
ENSFCAG00000005366	None	None	None	None	None	None	Up	None
ENSFCAG00000005367	Up	Up	Up	Up	Up	Up	Up	Up
ENSFCAG00000005369	None	None	None	None	Down	None	None	Down
ENSFCAG00000005373	None	None	None	None	None	None	Down	None
ENSFCAG00000005384	None	None	None	None	Down	Down	Down	Down
ENSFCAG00000005389	None	None	None	None	None	Down	None	None
ENSFCAG00000005390	Down	Down	Down	Down	Down	Down	Down	Down
ENSFCAG00000005402	None	None	None	None	Down	Down	Down	Down
ENSFCAG00000005404	None	Up	None	Up	Up	Up	Up	Up
ENSFCAG00000005416	Up	Up	Up	Up	Up	Up	Up	Up
ENSFCAG00000005417	Up	Up	None	Up	Up	Up	None	Up
ENSFCAG00000005418	None	None	None	None	Up	Up	Up	Up
ENSFCAG00000005428	None	None	Down	None	None	None	None	None
ENSFCAG00000005430	None	None	None	None	None	None	None	None
ENSFCAG00000005432	None	None	None	None	Up	Up	None	Up
ENSFCAG00000005433	None	None	None	None	Down	Down	Down	Down
ENSFCAG00000005435	None	None	Down	None	Down	Down	Down	Down
ENSFCAG00000005436	None	None	None	None	Up	Up	Up	Up
ENSFCAG00000005438	None	None	None	None	Up	None	None	Up
ENSFCAG00000005440	Down	Down	Down	Down	Up	Up	None	Up
ENSFCAG00000005455	Down	Down	None	Down	None	None	None	None
ENSFCAG00000005458	Up	None	Up	None	Up	Up	Up	Up
ENSFCAG00000005459	None	None	None	None	Up	Up	Up	Up
ENSFCAG00000005460	None	None	None	None	Up	Up	Up	Up
ENSFCAG00000005464	Up	Up	Up	Up	Up	Up	Up	Up
ENSFCAG00000005467	Up	Up	Up	Up	Up	Up	None	Up
ENSFCAG00000005468	None	None	None	None	None	None	Down	None
ENSFCAG00000005470	None	None	None	None	Down	Down	Down	Down
ENSFCAG00000005473	None	None	None	Up	None	None	None	None
ENSFCAG00000005474	None	None	None	None	Up	Up	None	Up
ENSFCAG00000005475	None	None	None	None	None	None	None	None
ENSFCAG00000005476	None	None	None	None	Down	Down	Down	Down
ENSFCAG00000005480	None	None	None	None	None	None	Up	None
ENSFCAG00000005488	None	None	Up	None	Up	Up	Up	Up
ENSFCAG00000005493	Up	Up	Up	Up	Up	Up	Up	Up
ENSFCAG00000005505	None	Up	None	None	Up	Up	Up	Up
ENSFCAG00000005507	Up	Up	Up	Up	None	None	Up	None
ENSFCAG00000005509	Down	None	Down	None	None	None	None	None
ENSFCAG00000005517	None	None	None	None	Up	Up	Up	Up
ENSFCAG00000005527	Up	Up	Up	None	Up	Up	Up	Up
ENSFCAG00000005528	None	None	None	None	Down	Down	Down	Down
ENSFCAG00000005533	None	None	None	None	None	None	Down	None
ENSFCAG00000005535	Down	Down	Down	Down	Down	Down	Down	Down
ENSFCAG00000005536	Up	Up	Up	None	Up	Up	Up	Up
ENSFCAG00000005541	None	None	None	None	None	None	Down	None
ENSFCAG00000005547	Up	None	Up	None	None	None	None	None
ENSFCAG00000005551	None	None	None	None	Up	Up	Up	Up
ENSFCAG00000005552	None	None	Down	None	None	None	Down	None
ENSFCAG00000005554	None	Up	None	None	Down	Down	Down	Down
ENSFCAG00000005557	Up	Up	Up	Up	Up	Up	Up	Up
ENSFCAG00000005567	None	None	None	None	None	None	None	None
ENSFCAG00000005568	Down	None	Down	Down	None	None	None	Down
ENSFCAG00000005572	Up	None	Up	None	Up	Up	Up	Up
ENSFCAG00000005573	None	None	None	None	Up	Up	Up	Up
ENSFCAG00000005574	None	None	None	None	Up	Up	None	None
ENSFCAG00000005578	None	None	None	None	Up	Up	None	Up
ENSFCAG00000005580	Down	Down	Down	Down	Down	Down	Down	Down
ENSFCAG00000005583	None	None	None	None	None	None	None	None
ENSFCAG00000005584	Up	None	Up	None	None	Up	Up	Up
ENSFCAG00000005585	None	None	Down	None	None	None	None	None
ENSFCAG00000005586	None	None	None	None	None	None	None	None
ENSFCAG00000005587	None	None	None	None	None	None	Down	None
ENSFCAG00000005594	None	None	None	None	Up	Up	None	Up
ENSFCAG00000005595	None	None	None	None	Up	Up	None	Up
ENSFCAG00000005597	None	None	None	None	Up	Up	Up	Up
ENSFCAG00000005601	None	None	None	None	Up	Up	None	Up
ENSFCAG00000005602	Down	Down	Down	Down	Down	Down	Down	Down
ENSFCAG00000005613	None	None	None	Down	None	None	None	None
ENSFCAG00000005617	Down	None	None	None	Up	Up	Up	Up
ENSFCAG00000005621	None	None	None	None	Up	Up	None	Up
ENSFCAG00000005622	Down	Down	Down	Down	Down	Down	None	Down
ENSFCAG00000005624	None	None	None	None	None	None	None	None
ENSFCAG00000005625	None	None	None	None	None	None	None	None
ENSFCAG00000005626	Up	Up	Up	Up	Up	Up	Up	Up
ENSFCAG00000005628	Up	Up	Up	Up	Up	Up	Up	Up
ENSFCAG00000005629	Up	Up	Up	Up	Up	Up	Up	Up
ENSFCAG00000005630	None	None	None	None	None	None	None	None
ENSFCAG00000005631	None	None	None	None	Down	None	None	None
ENSFCAG00000005638	Down	Down	Down	Down	Up	Up	Up	Up
ENSFCAG00000005640	Up	Up	Up	Up	None	None	Up	None
ENSFCAG00000005651	None	None	None	None	None	None	Down	None
ENSFCAG00000005659	None	None	None	Up	None	None	None	None
ENSFCAG00000005664	None	None	None	None	Down	Down	Down	Down
ENSFCAG00000005667	None	None	None	None	Up	Up	Up	Up
ENSFCAG00000005668	None	Up	Up	None	Up	Up	None	Up
ENSFCAG00000005670	None	None	None	None	Up	Up	Up	Up
ENSFCAG00000005672	None	None	Down	None	Up	Up	Up	Up
ENSFCAG00000005677	Up	Up	Up	None	Up	Up	Up	Up
ENSFCAG00000005682	None	None	None	None	Up	None	None	Up
ENSFCAG00000005687	None	None	None	None	Up	Up	None	Up
ENSFCAG00000005695	None	None	None	None	None	None	None	None
ENSFCAG00000005700	Up	Up	Up	None	None	None	None	None
ENSFCAG00000005701	None	None	None	None	None	None	None	None
ENSFCAG00000005710	None	None	None	None	Down	Down	None	Down
ENSFCAG00000005715	None	None	None	None	None	None	Down	None
ENSFCAG00000005716	None	None	None	None	None	Up	Up	Up
ENSFCAG00000005718	None	None	None	None	None	None	None	Up
ENSFCAG00000005726	Up	Up	Up	None	Up	Up	Up	Up
ENSFCAG00000005729	None	None	Down	None	None	None	None	None
ENSFCAG00000005738	Down	Down	Down	Down	Down	Down	Down	Down
ENSFCAG00000005741	Down	None	Down	None	None	None	None	None
ENSFCAG00000005744	None	None	None	None	None	None	Down	None
ENSFCAG00000005747	None	None	None	None	Up	None	Up	Up
ENSFCAG00000005749	Up	Up	Up	Up	Up	Up	Up	Up
ENSFCAG00000005751	None	None	None	None	Up	None	None	None
ENSFCAG00000005754	None	None	None	None	Down	Down	Down	Down
ENSFCAG00000005755	None	None	None	None	Down	Down	Down	Down
ENSFCAG00000005757	None	Down	None	None	Down	Down	Down	Down
ENSFCAG00000005759	None	None	None	None	Up	Up	Up	Up
ENSFCAG00000005761	Down	Down	None	Down	None	None	None	None
ENSFCAG00000005764	None	None	None	None	None	None	None	None
ENSFCAG00000005766	None	None	None	None	None	Down	Down	None
ENSFCAG00000005772	None	None	None	None	None	None	Up	None
ENSFCAG00000005773	None	None	None	None	None	None	Up	None
ENSFCAG00000005774	Down	Down	Down	Down	Down	Down	None	Down
ENSFCAG00000005777	None	None	None	None	None	None	Down	None
ENSFCAG00000005778	None	None	None	None	Up	Up	None	Up
ENSFCAG00000005780	None	None	None	Up	None	None	None	None
ENSFCAG00000005782	Up	Up	Up	Up	Up	Up	None	Up
ENSFCAG00000005785	None	None	None	None	None	None	None	None
[truncated: 10,318 more rows]
