# Supplementary material
Source: Research Square preprint supplement (doi:10.21203/rs.3.rs-10223502/v1)
Supplement: Supplementary file 3 [file bdb98a2b4454b01b9aaeaf36.xlsx]

## Sheet: Sheet1
	Table S1:
	CRFK cell
	HDAC inhibitor	Concentration	Replicate	[# of cells] / 10^3 (0h)	[# of living cells] / 10^3 (24h)	[# of dead cells] / 10^3 (24h)
	Panobinostat	0.0561 nM	1	2200	2300	220
	(PA)		2	1690	1620	380
			3	1250	1170	180
	Trichostatin A	0.156 nM	1	2200	2100	119
	(TS)		2	1690	1680	162
			3	1250	1300	180
	Valproic acid	9.36 µM	1	2100	2200	300
	(VA)		2	1560	1460	176
			3	1250	1340	209
	Vorinostat	2.58 nM	1	1860	1780	210
	(VO)		2	1740	1850	1140
			3	1250	1250	144
	PG-4 cell
	HDAC inhibitor	Concentration	Replicate	[# of cells] / 10^4 (0h)	[# of living cells] / 10^4 (24h)	[# of dead cells] / 10^4 (24h)
	Panobinostat	0.26 nM	1	1570	1540	340
	(PA)		2	1480	1320	290
			3	1260	1250	340
	Trichostatin A	0.556 nM	1	1400	1460	260
	(TS)		2	1140	1730	890
			3	990	1130	350
	Valproic acid	15.563 µM	1	1580	1570	83
	(VA)		2	1480	1340	179
			3	1210	1100	92
	Vorinostat	13.23 nM	1	1480	1530	420
	(VO)		2	1230	1250	270
			3	1210	1170	150
